# Supplementary material for: A two-stage Bayesian method for estimating accuracy and disease prevalence for two dependent dichotomous screening tests when the status of individuals who are negative on both tests is unverified
Source: PubMed Central journal article supplement (PMC4193534; doi:10.1186/1471-2288-14-110), 2014-09-23

Gelman Rubin statistic

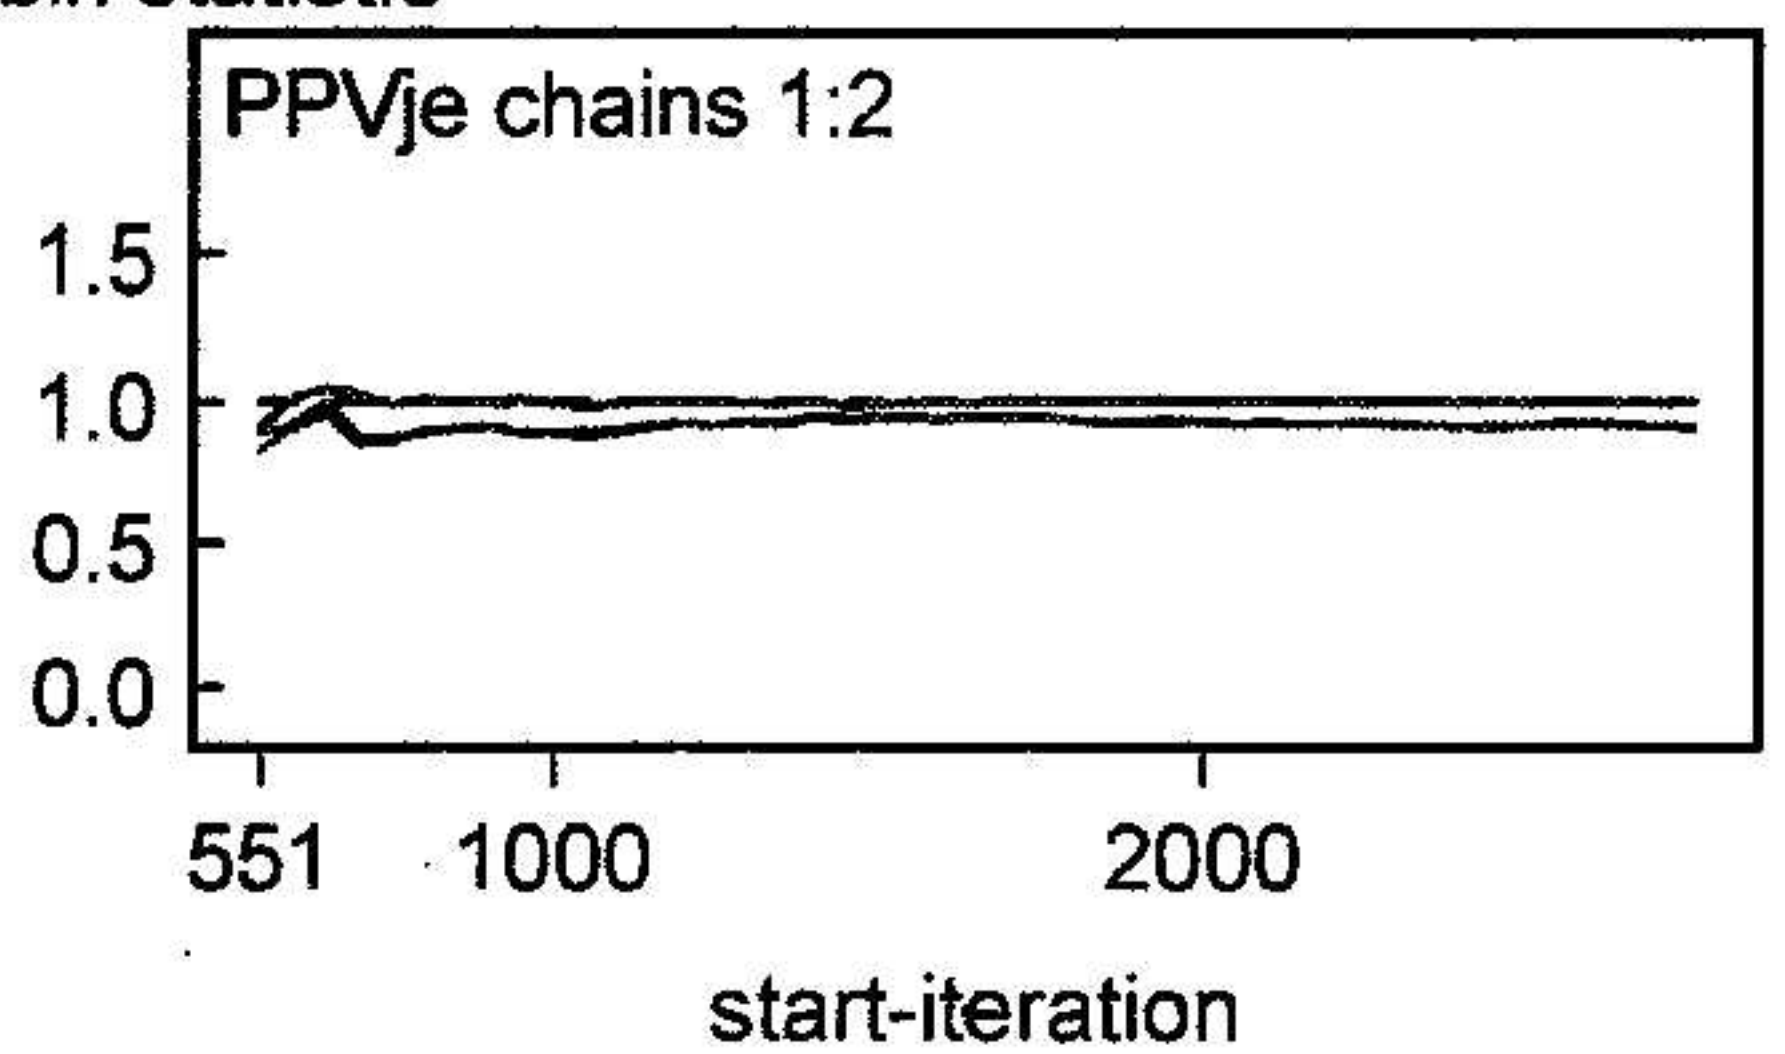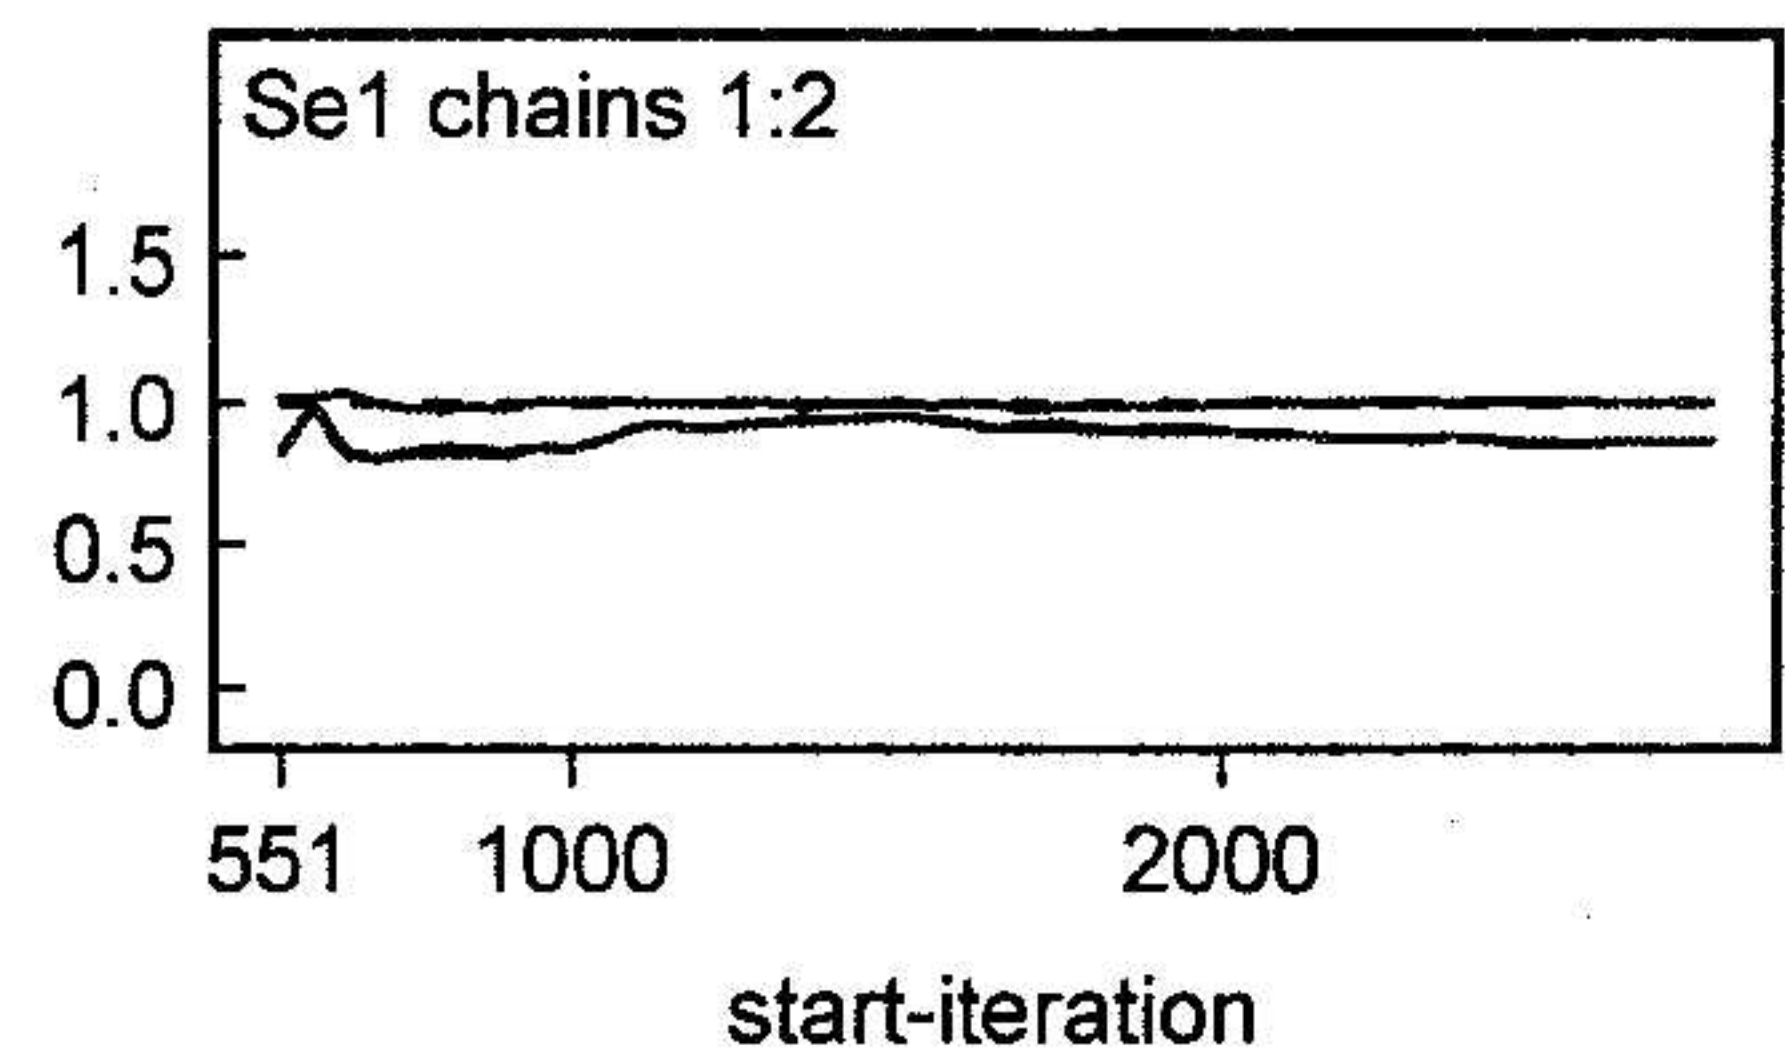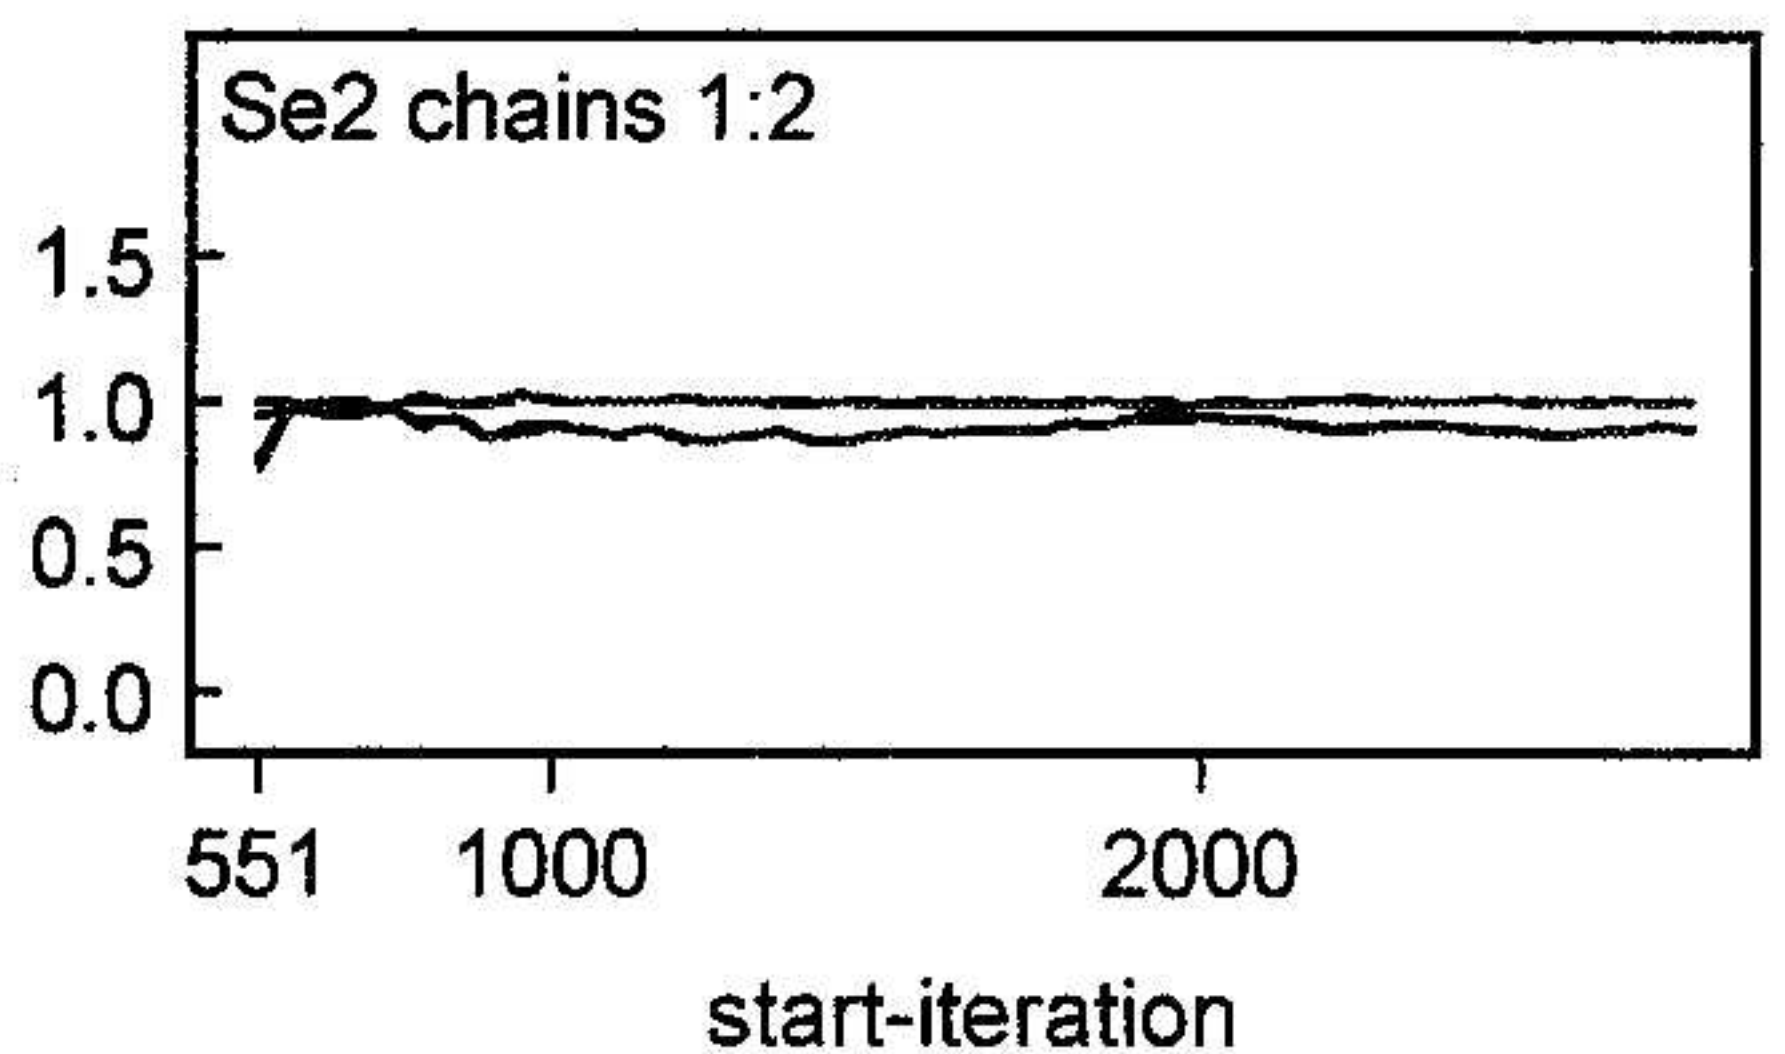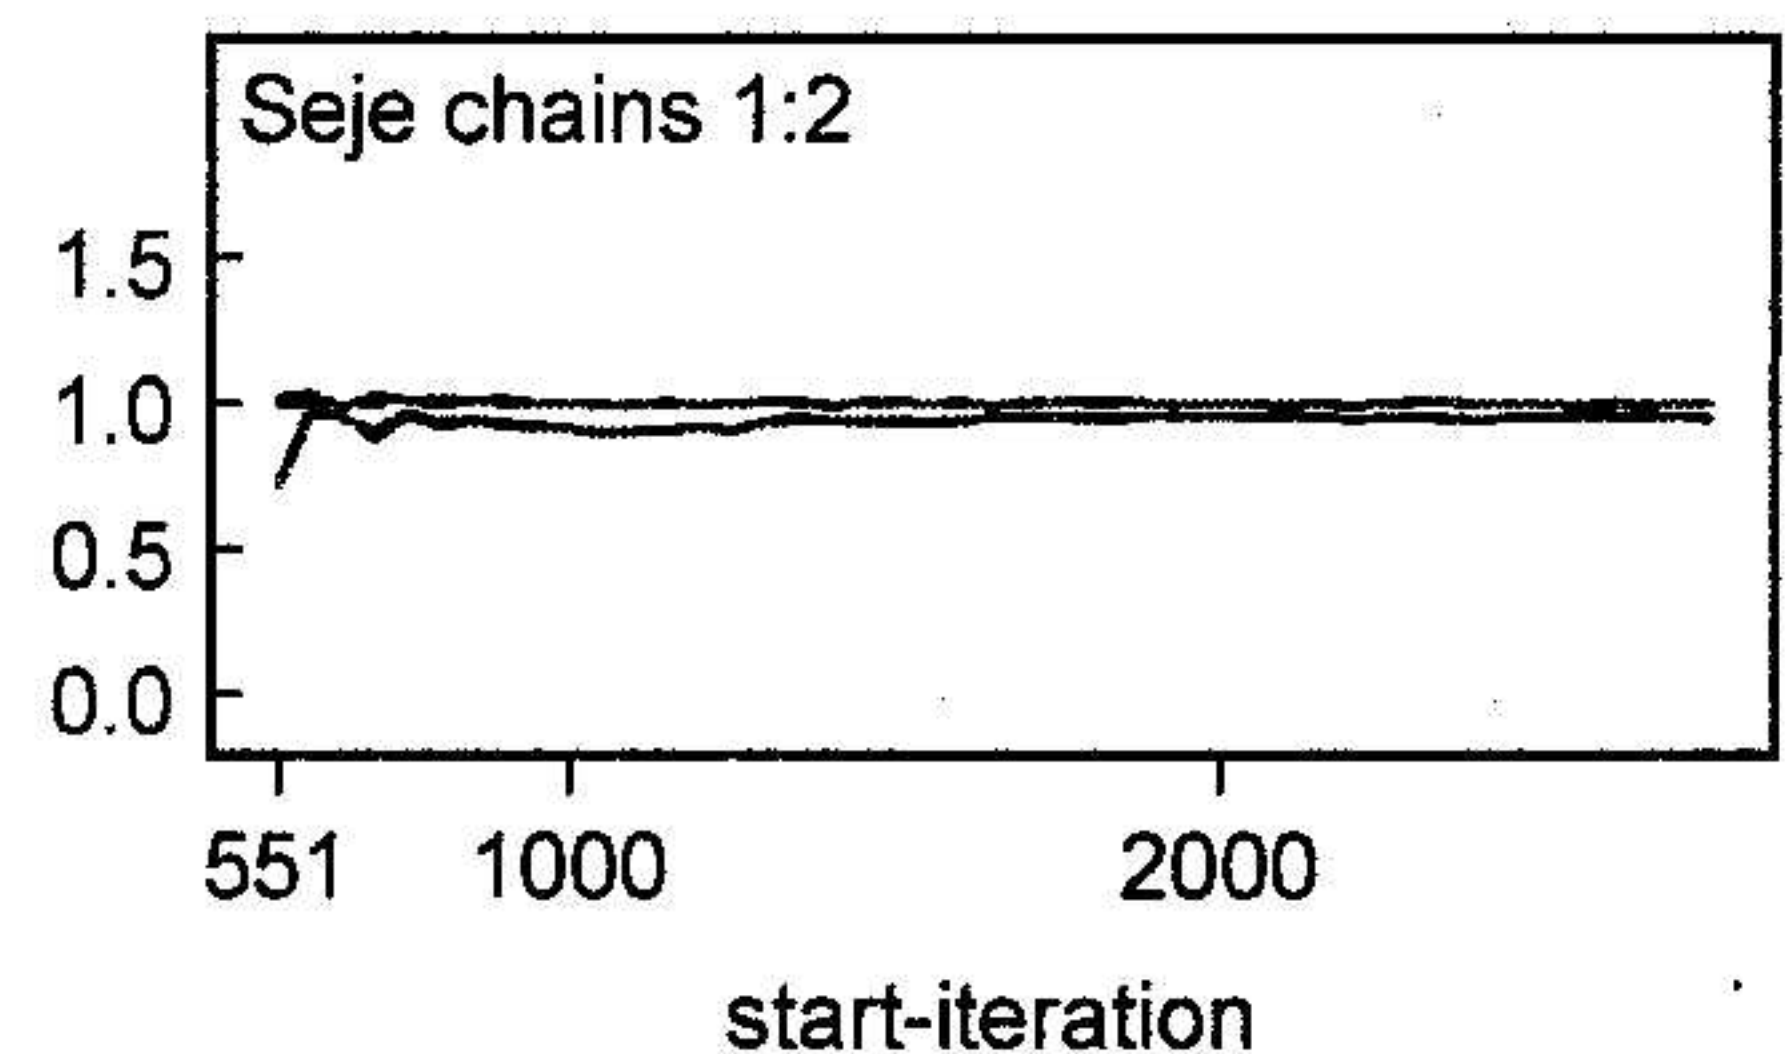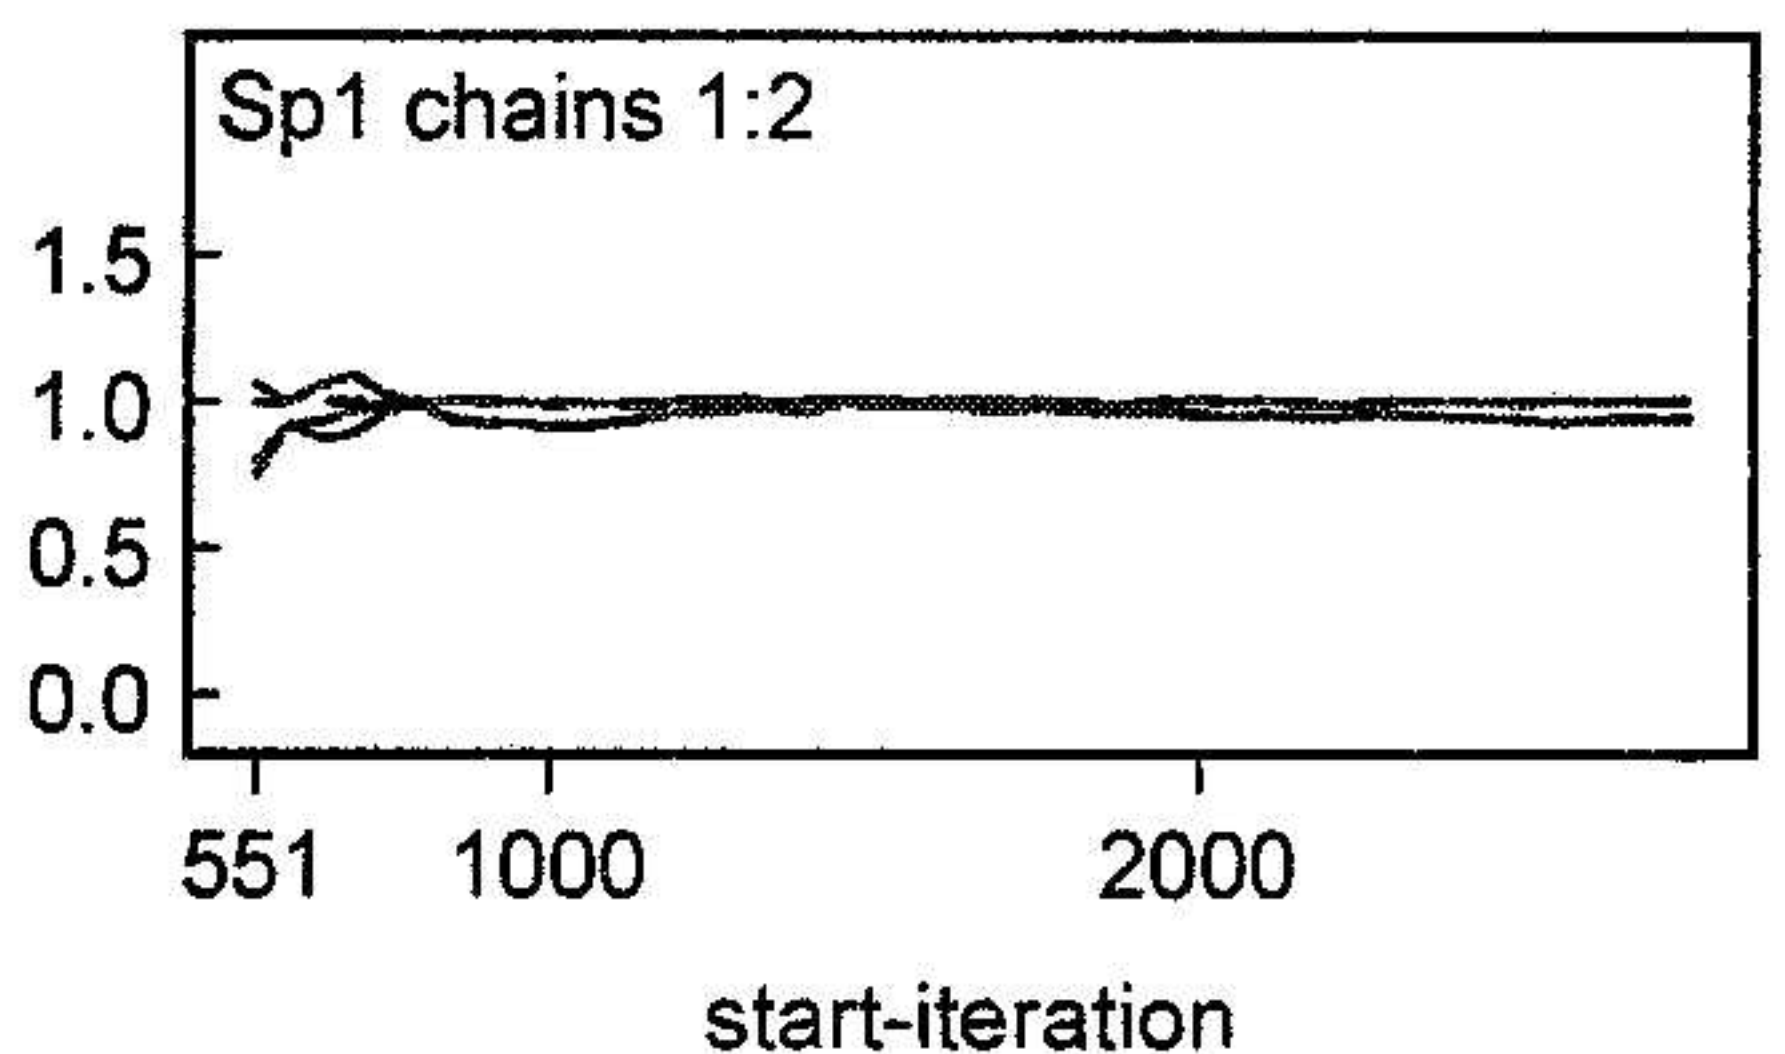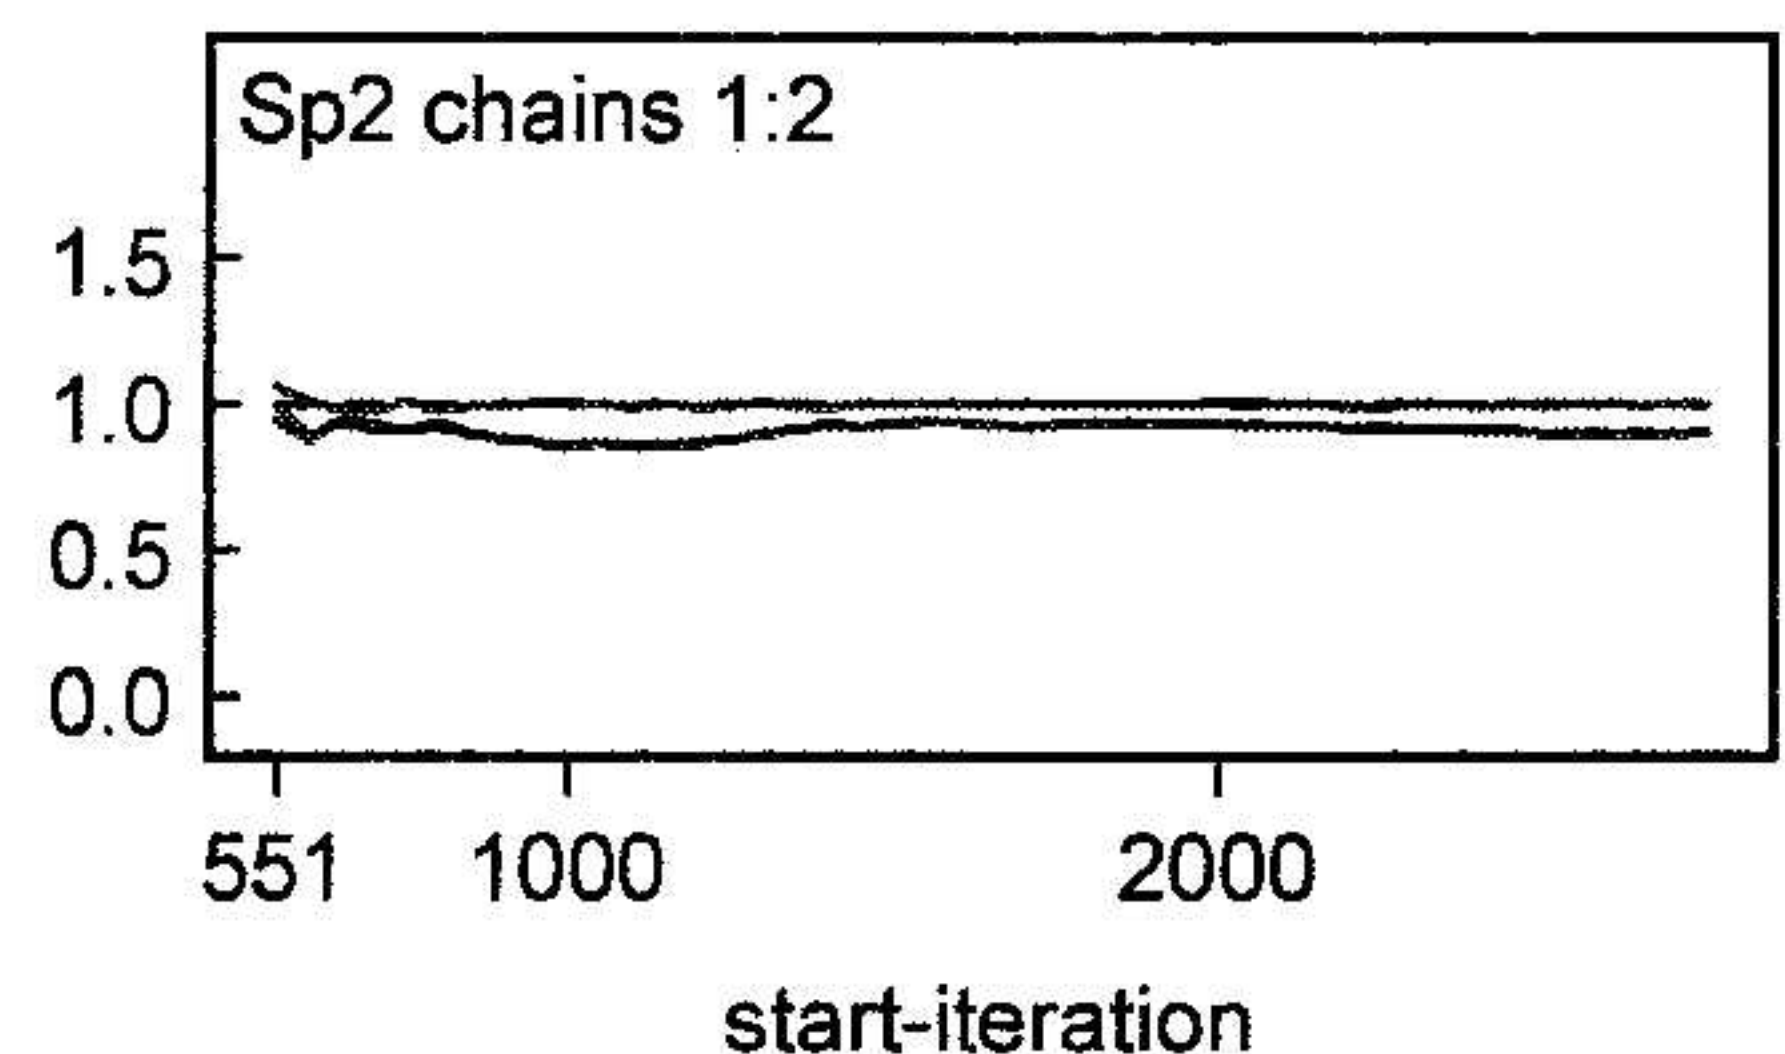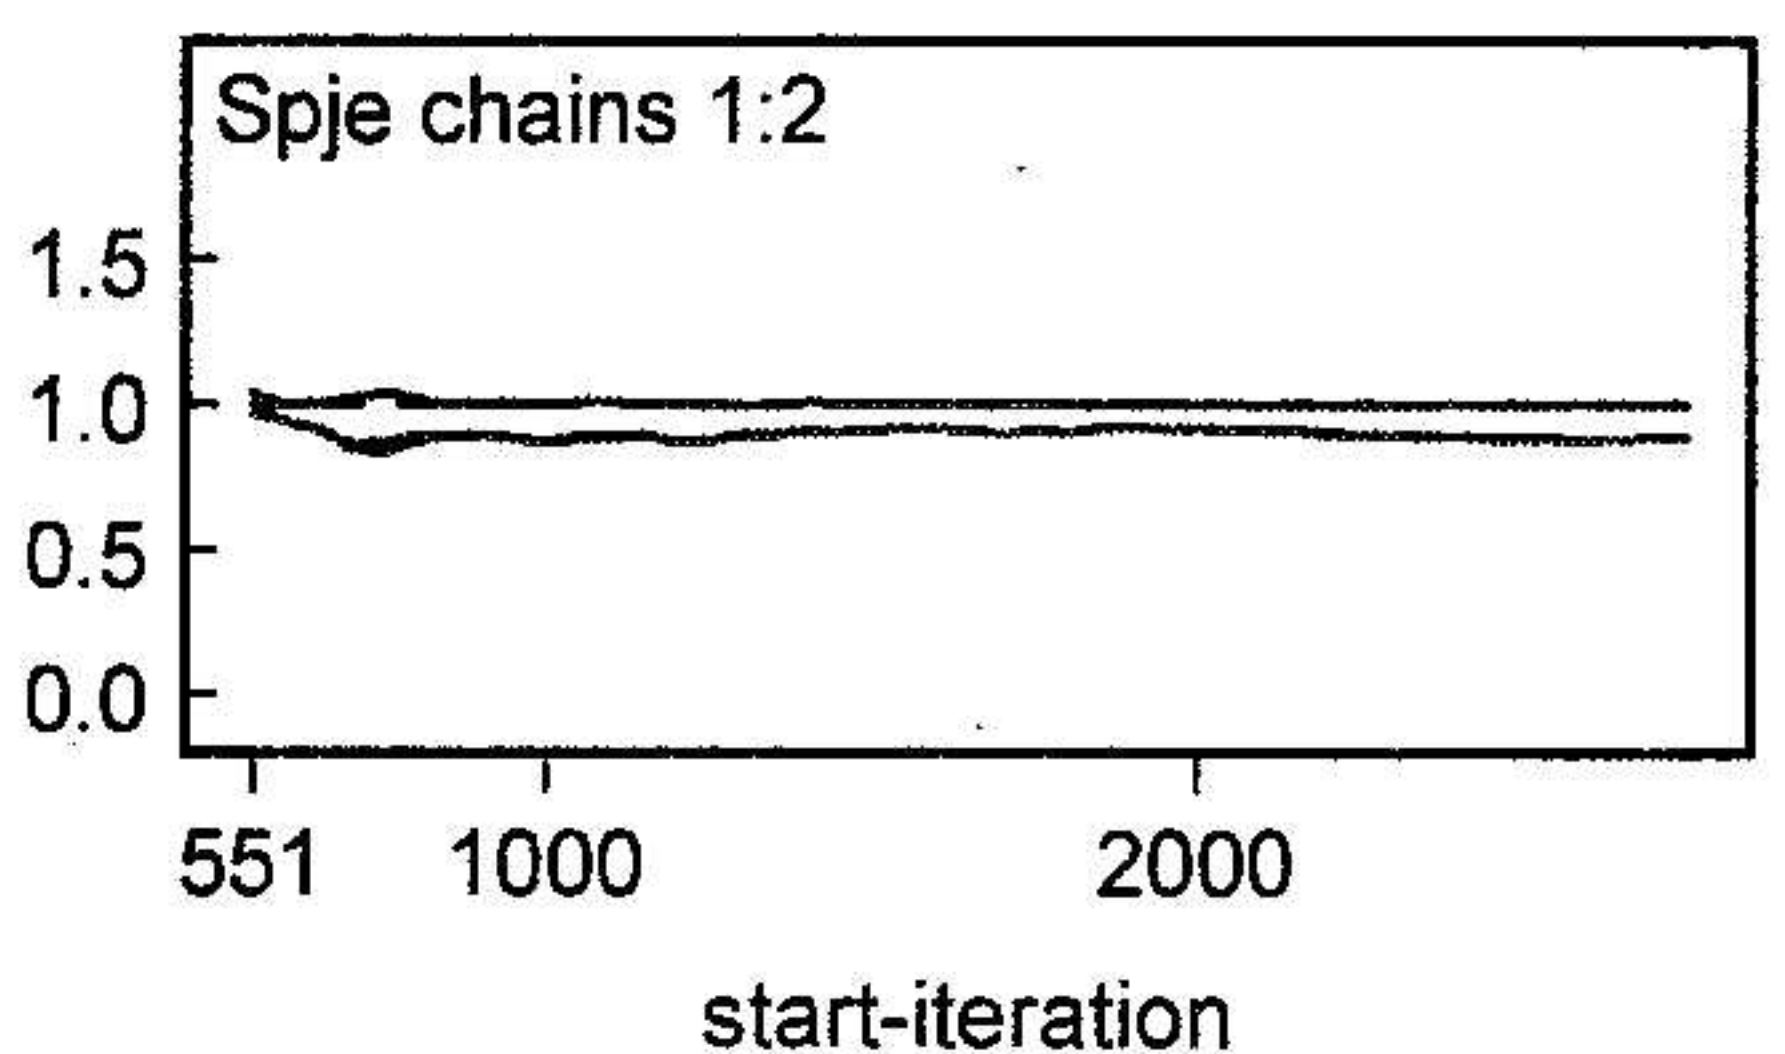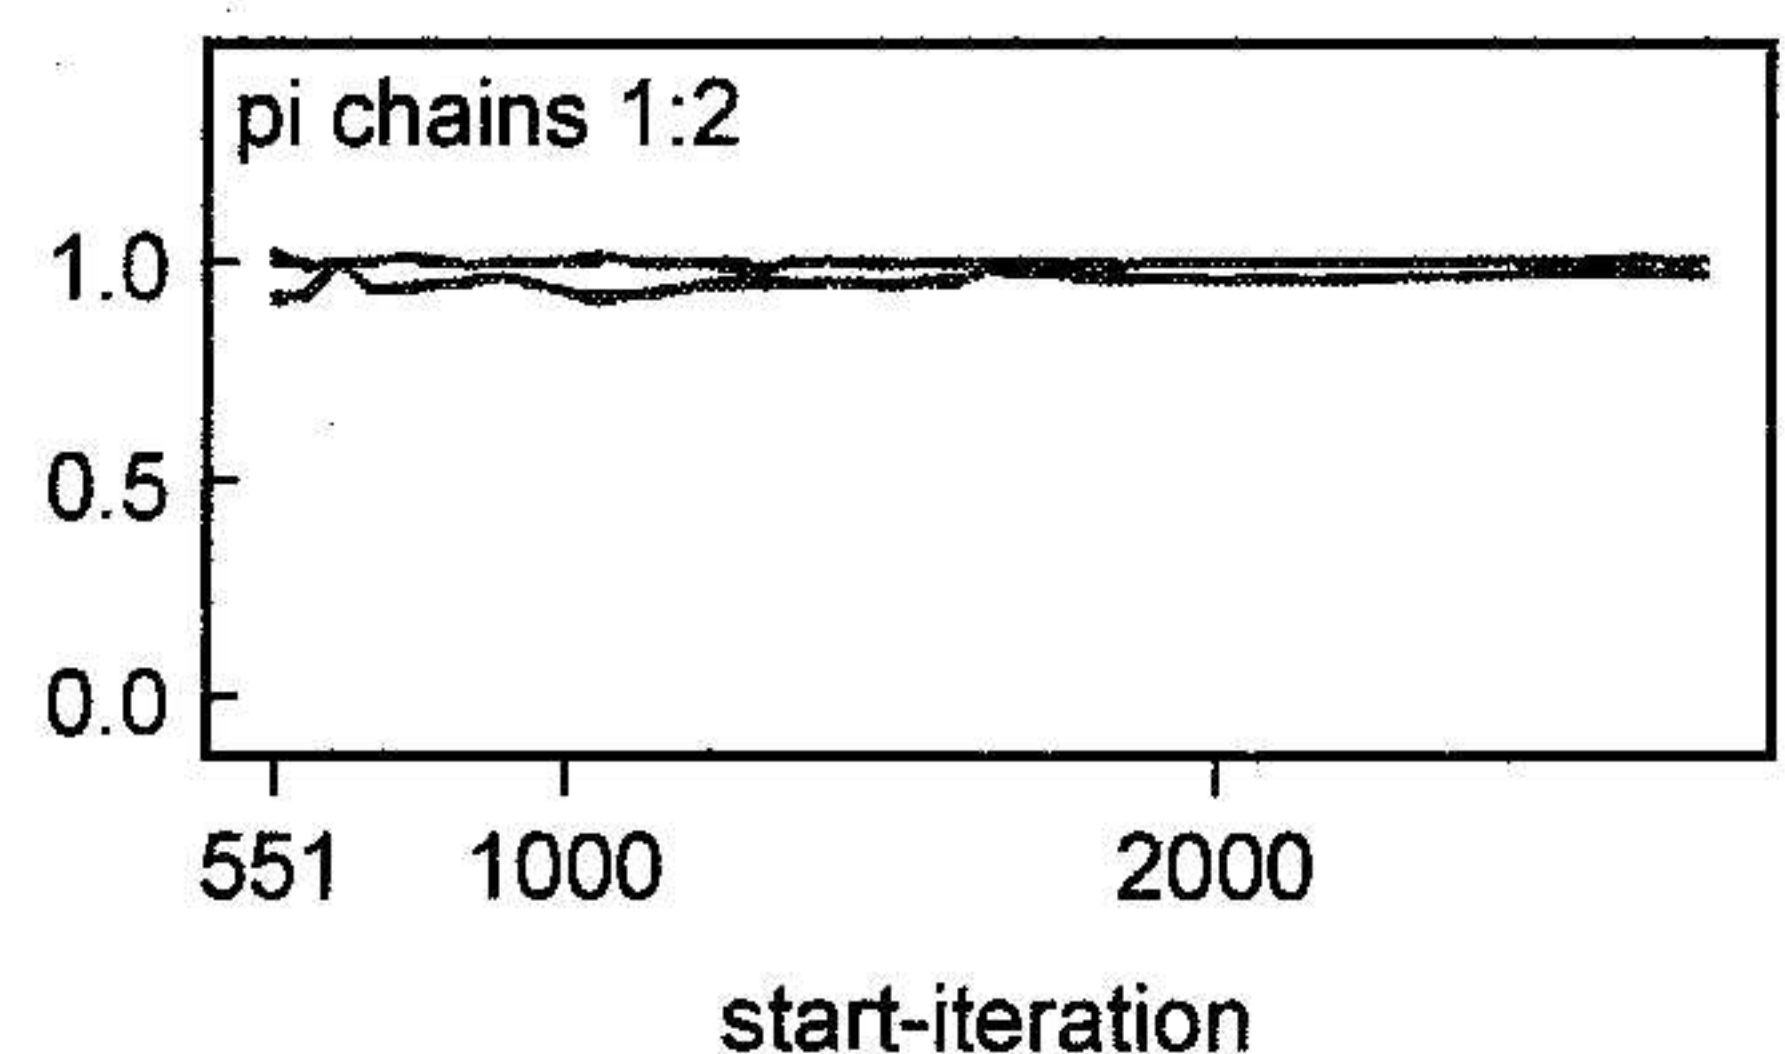

Running quantiles

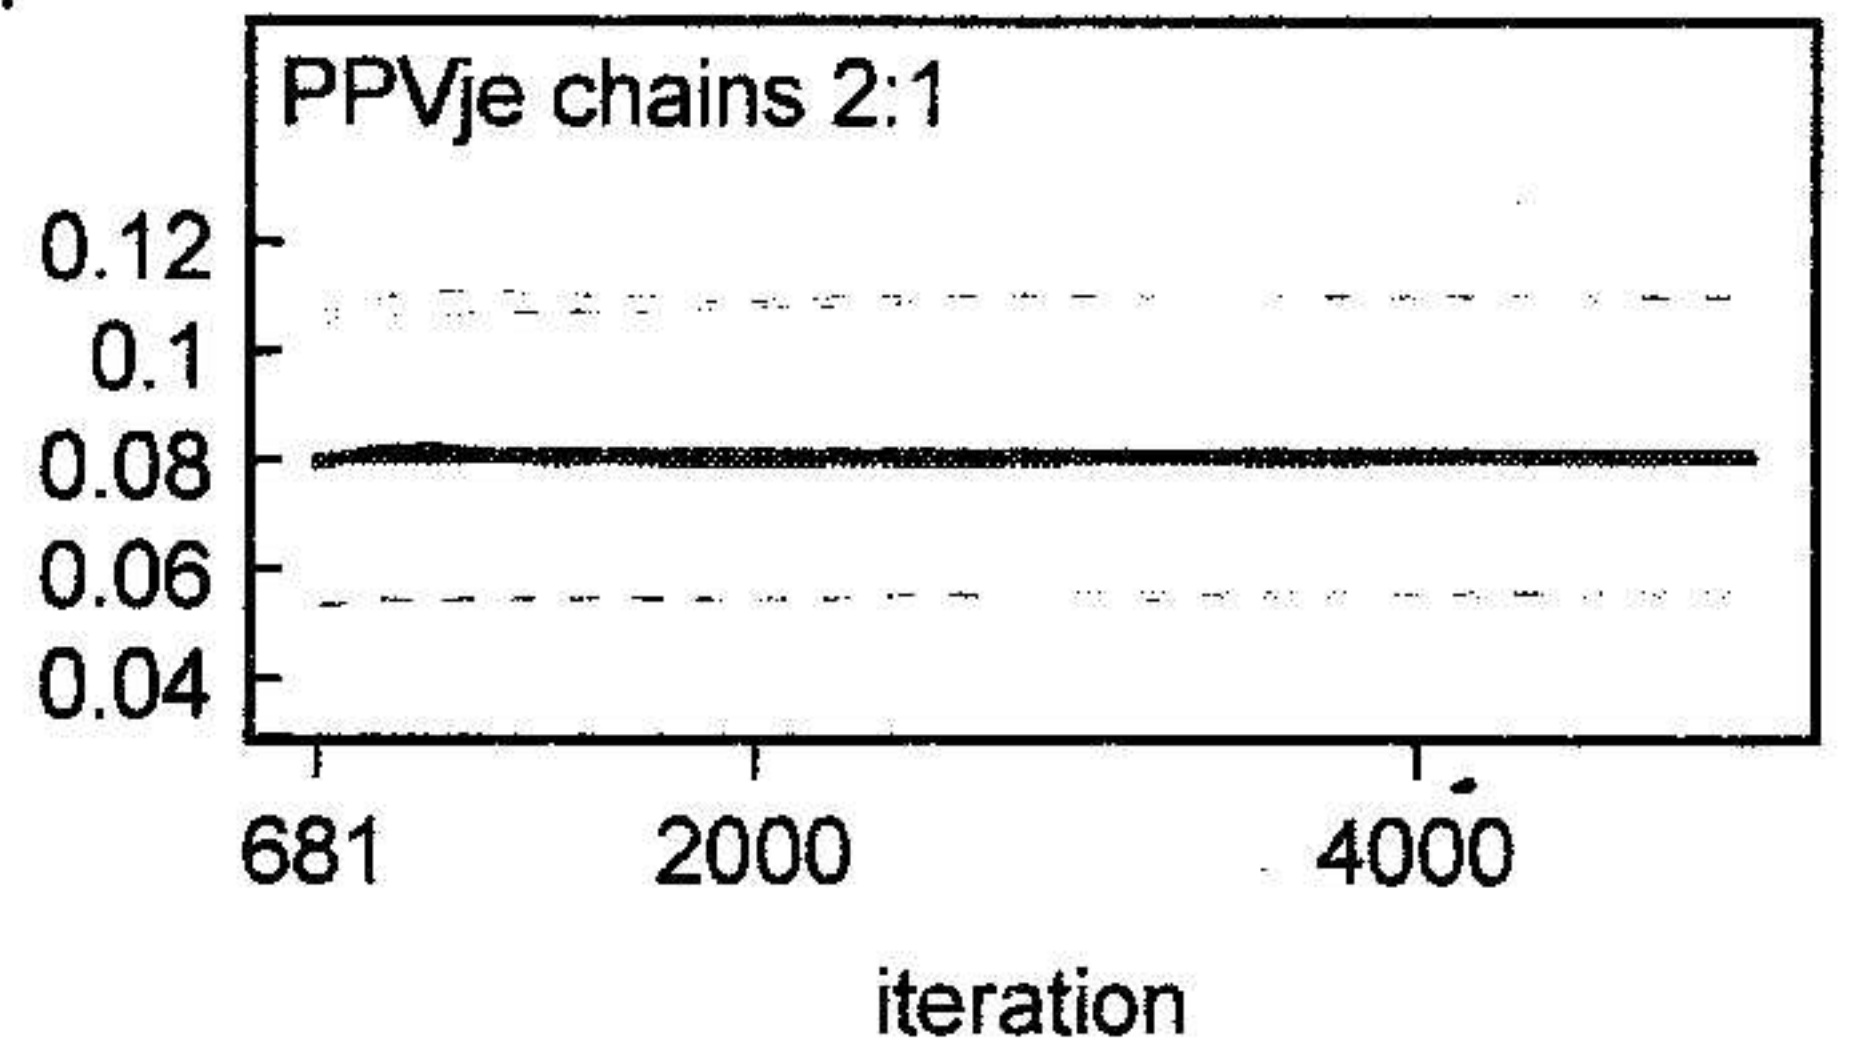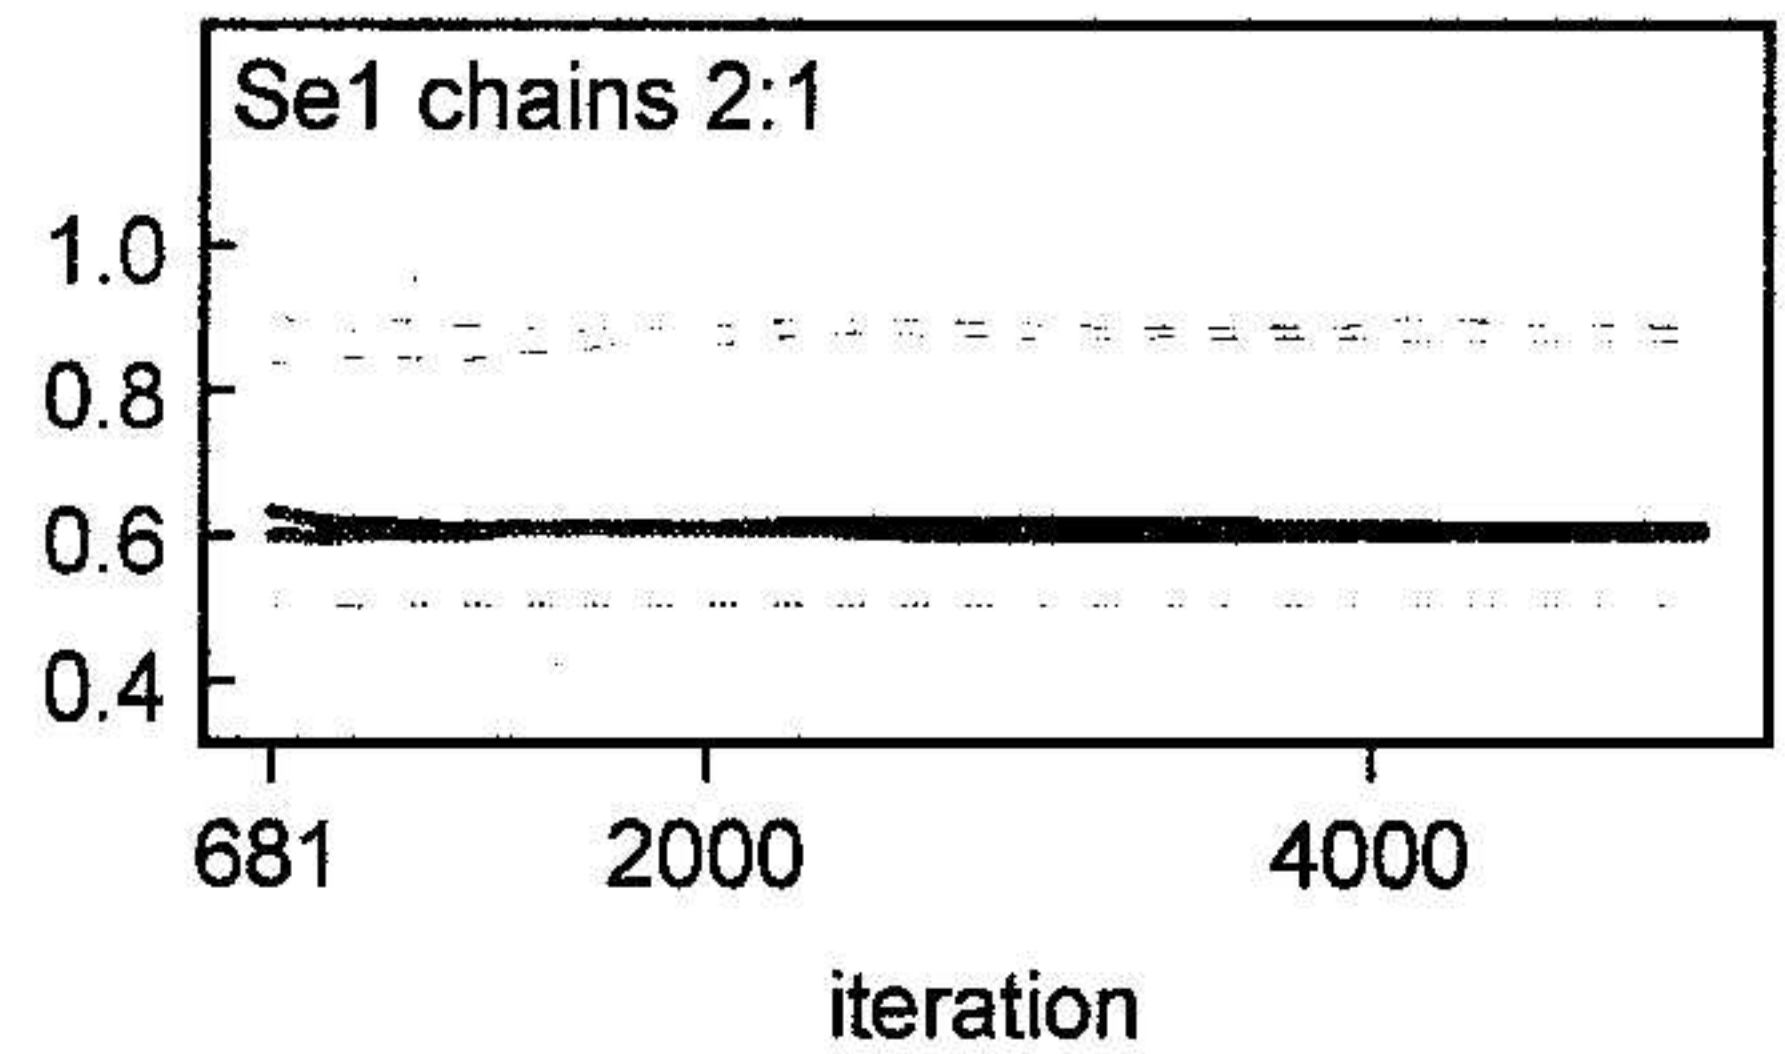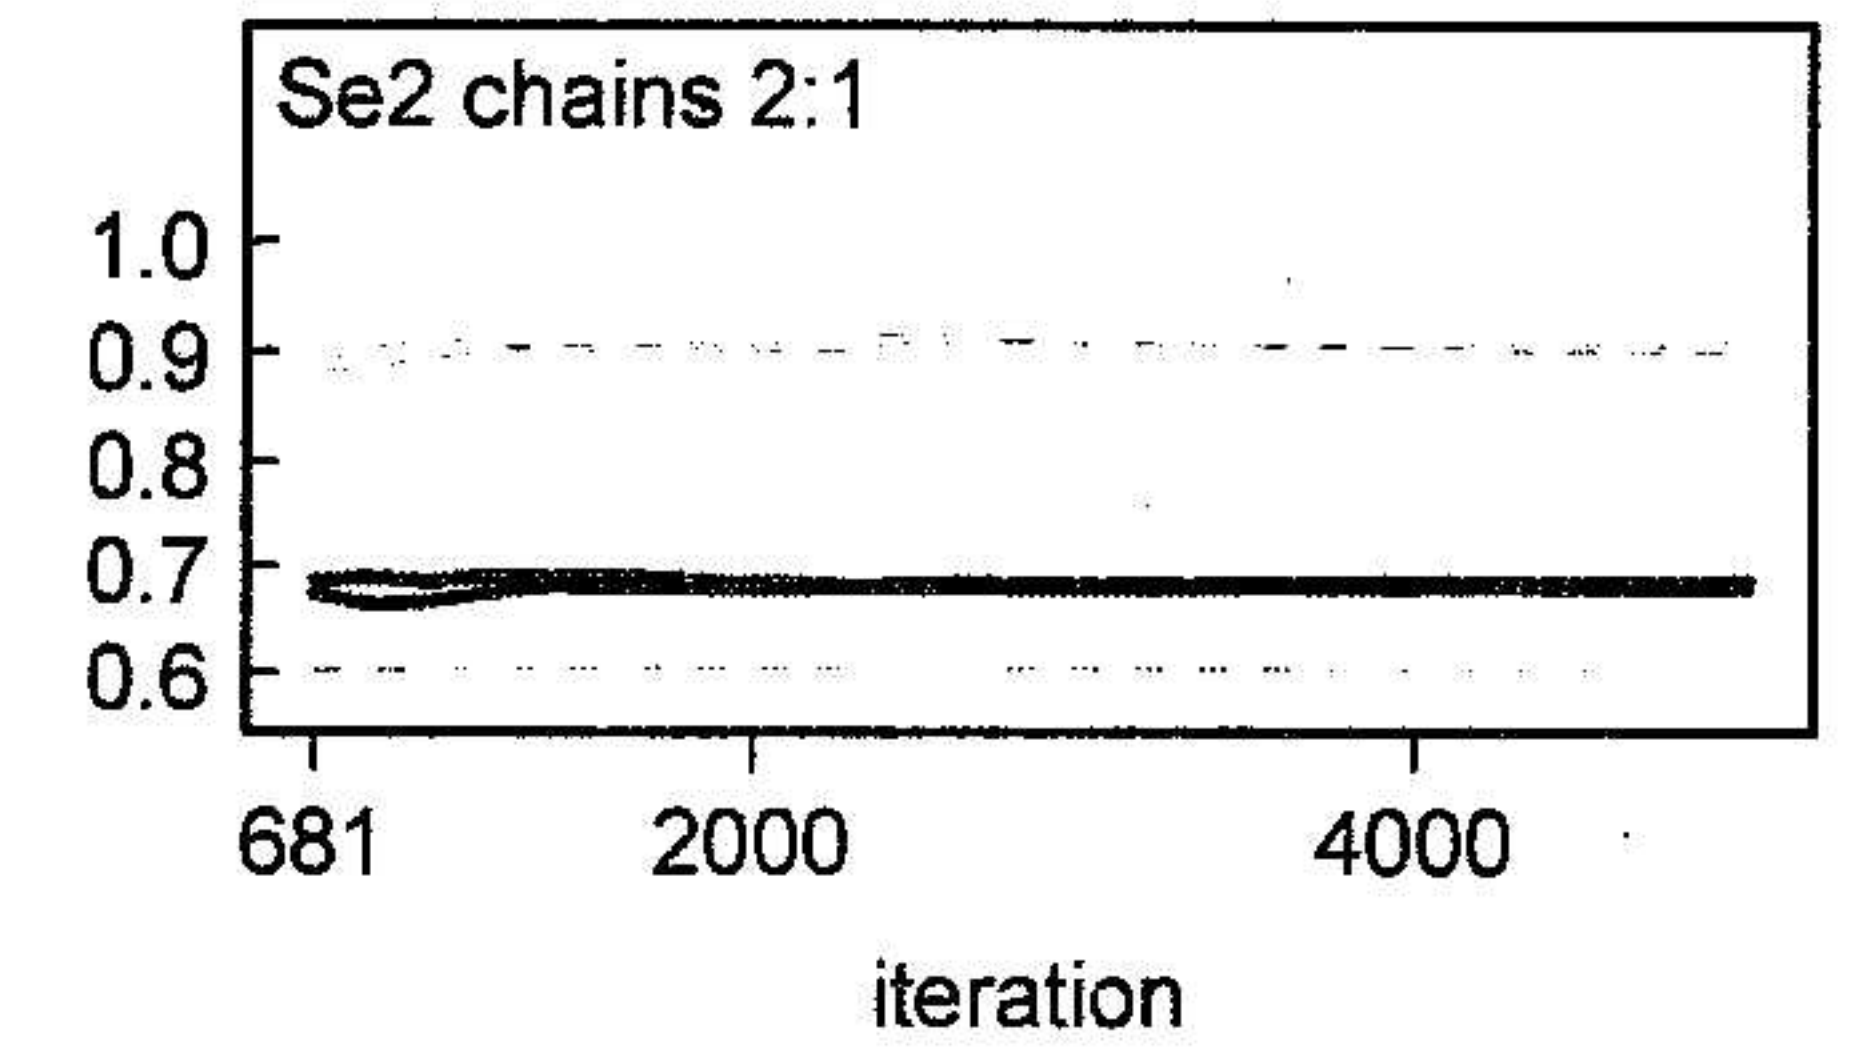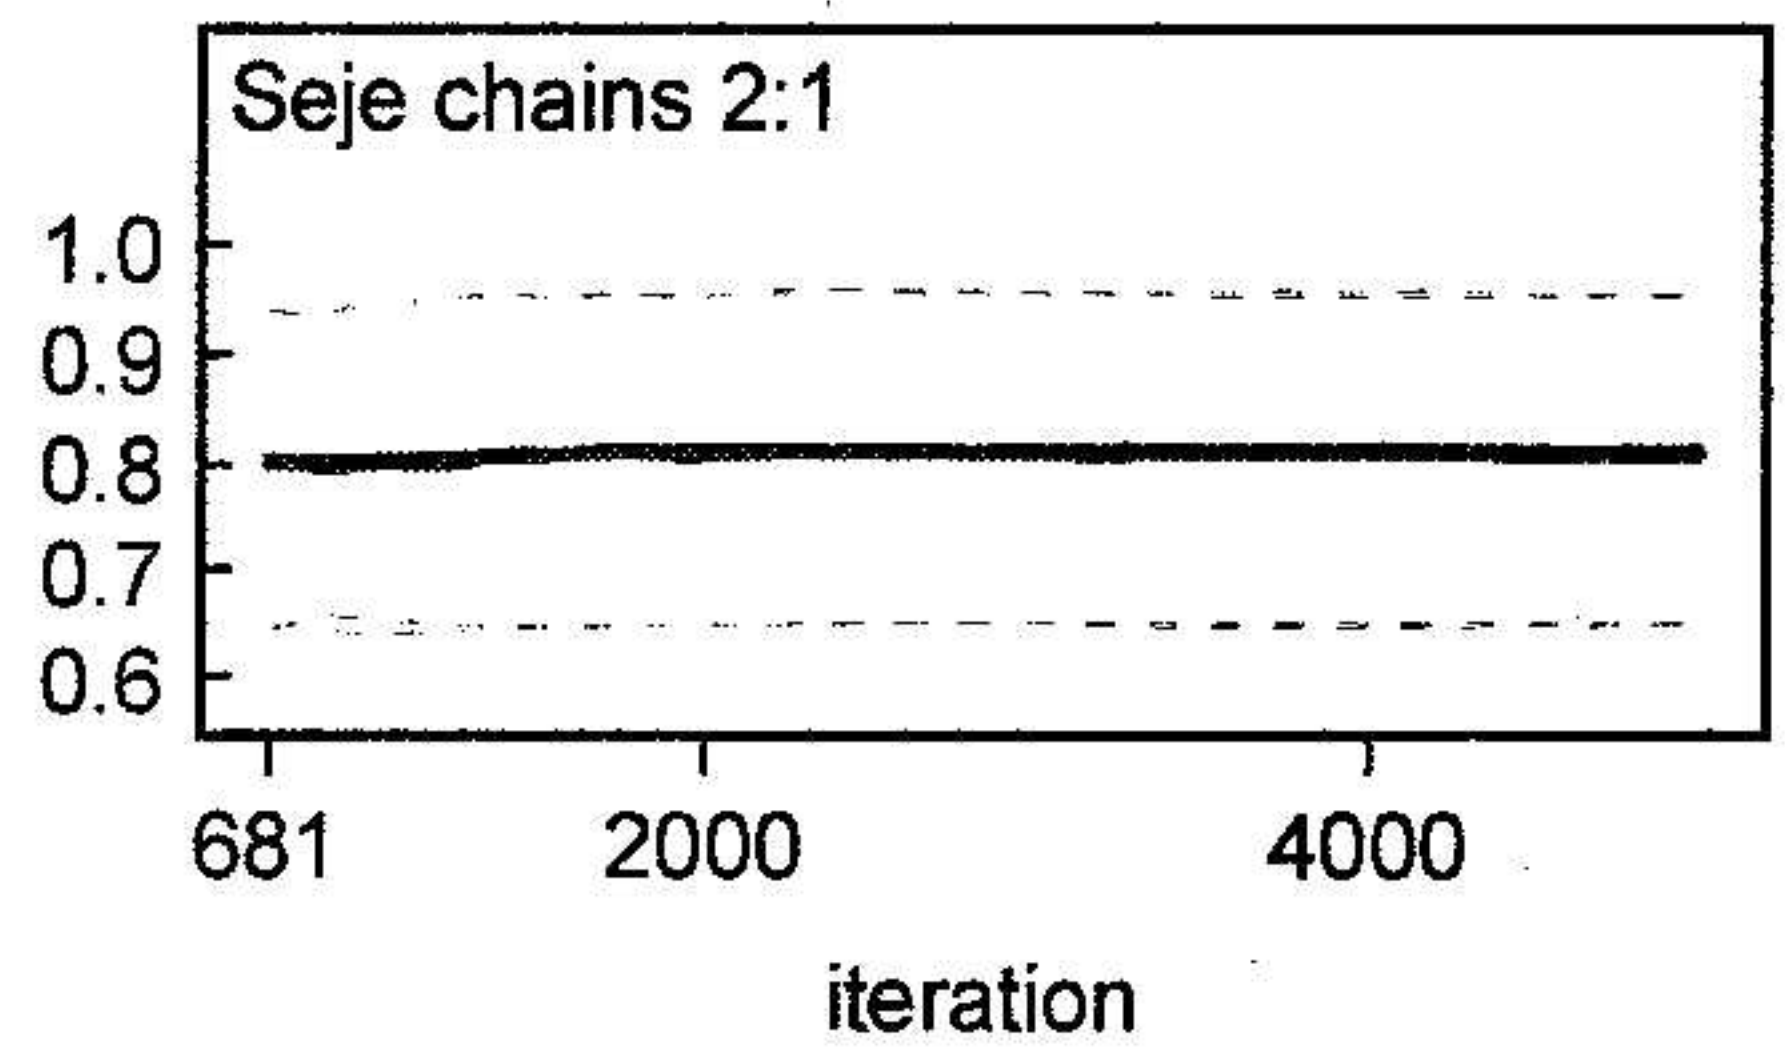



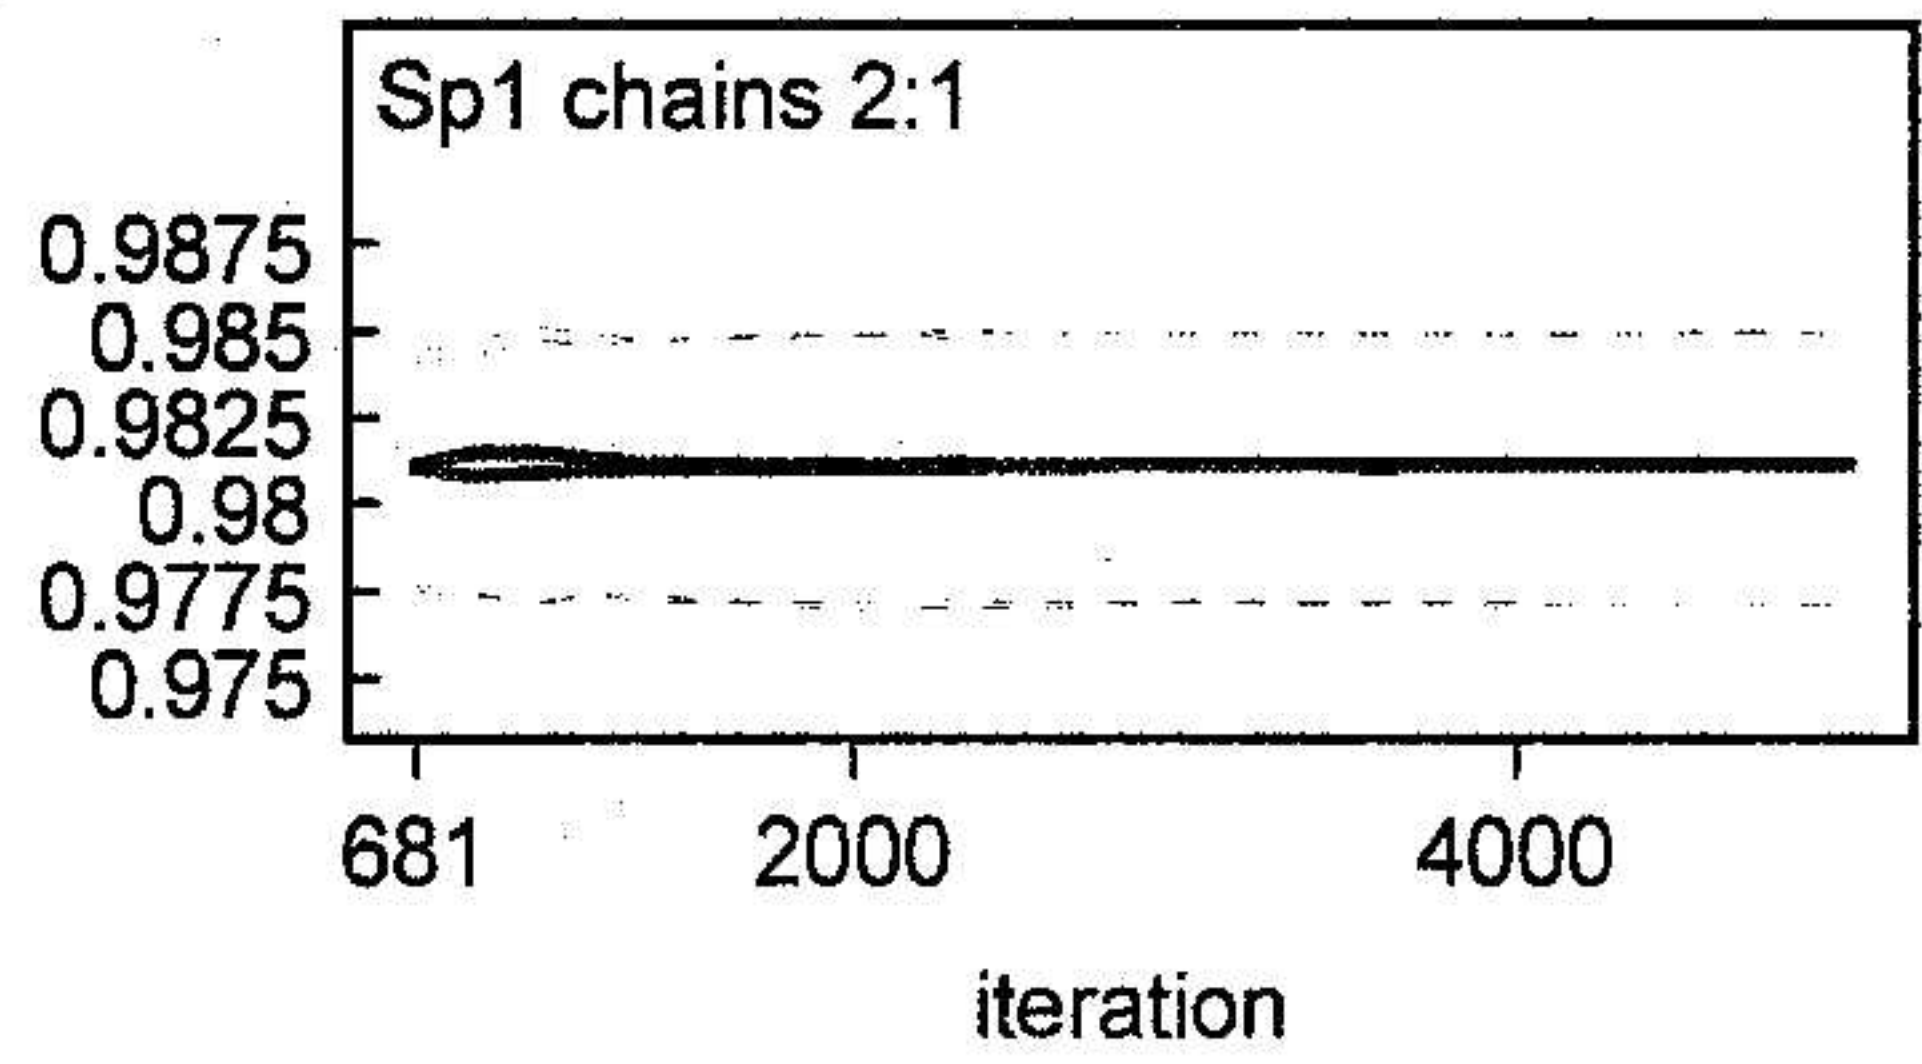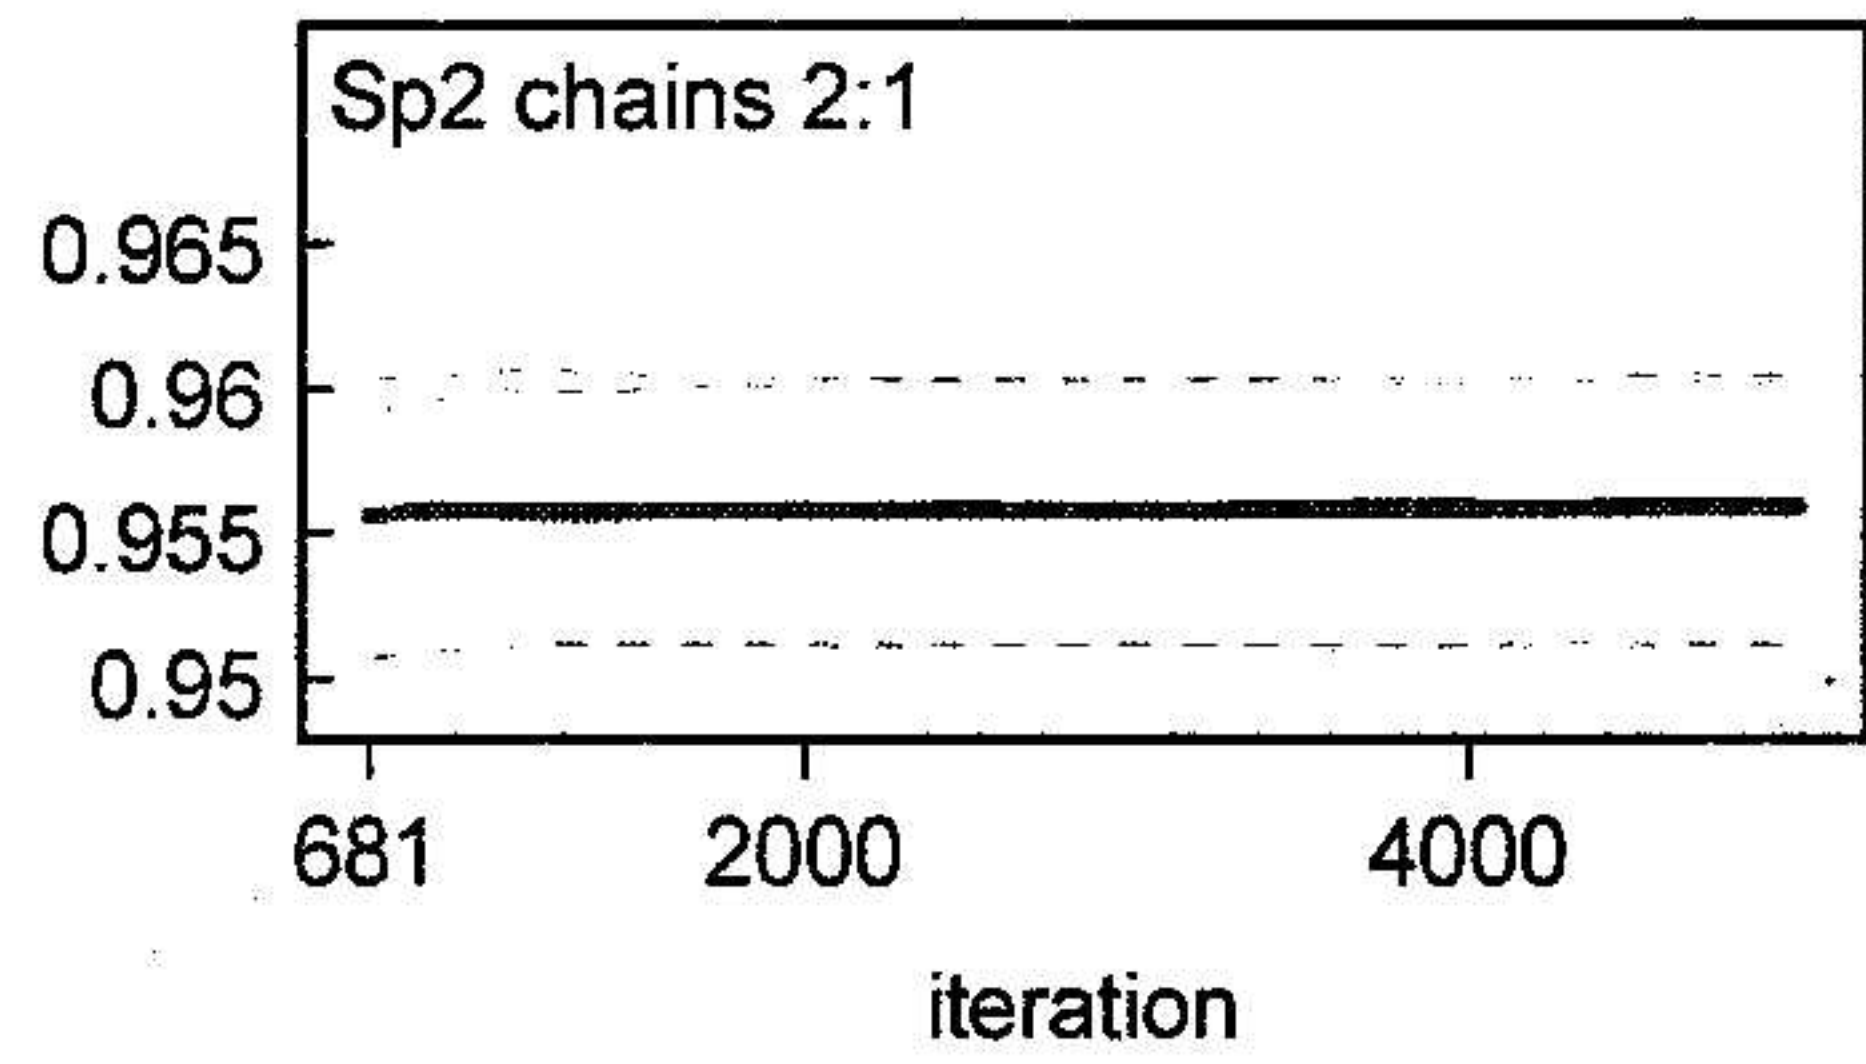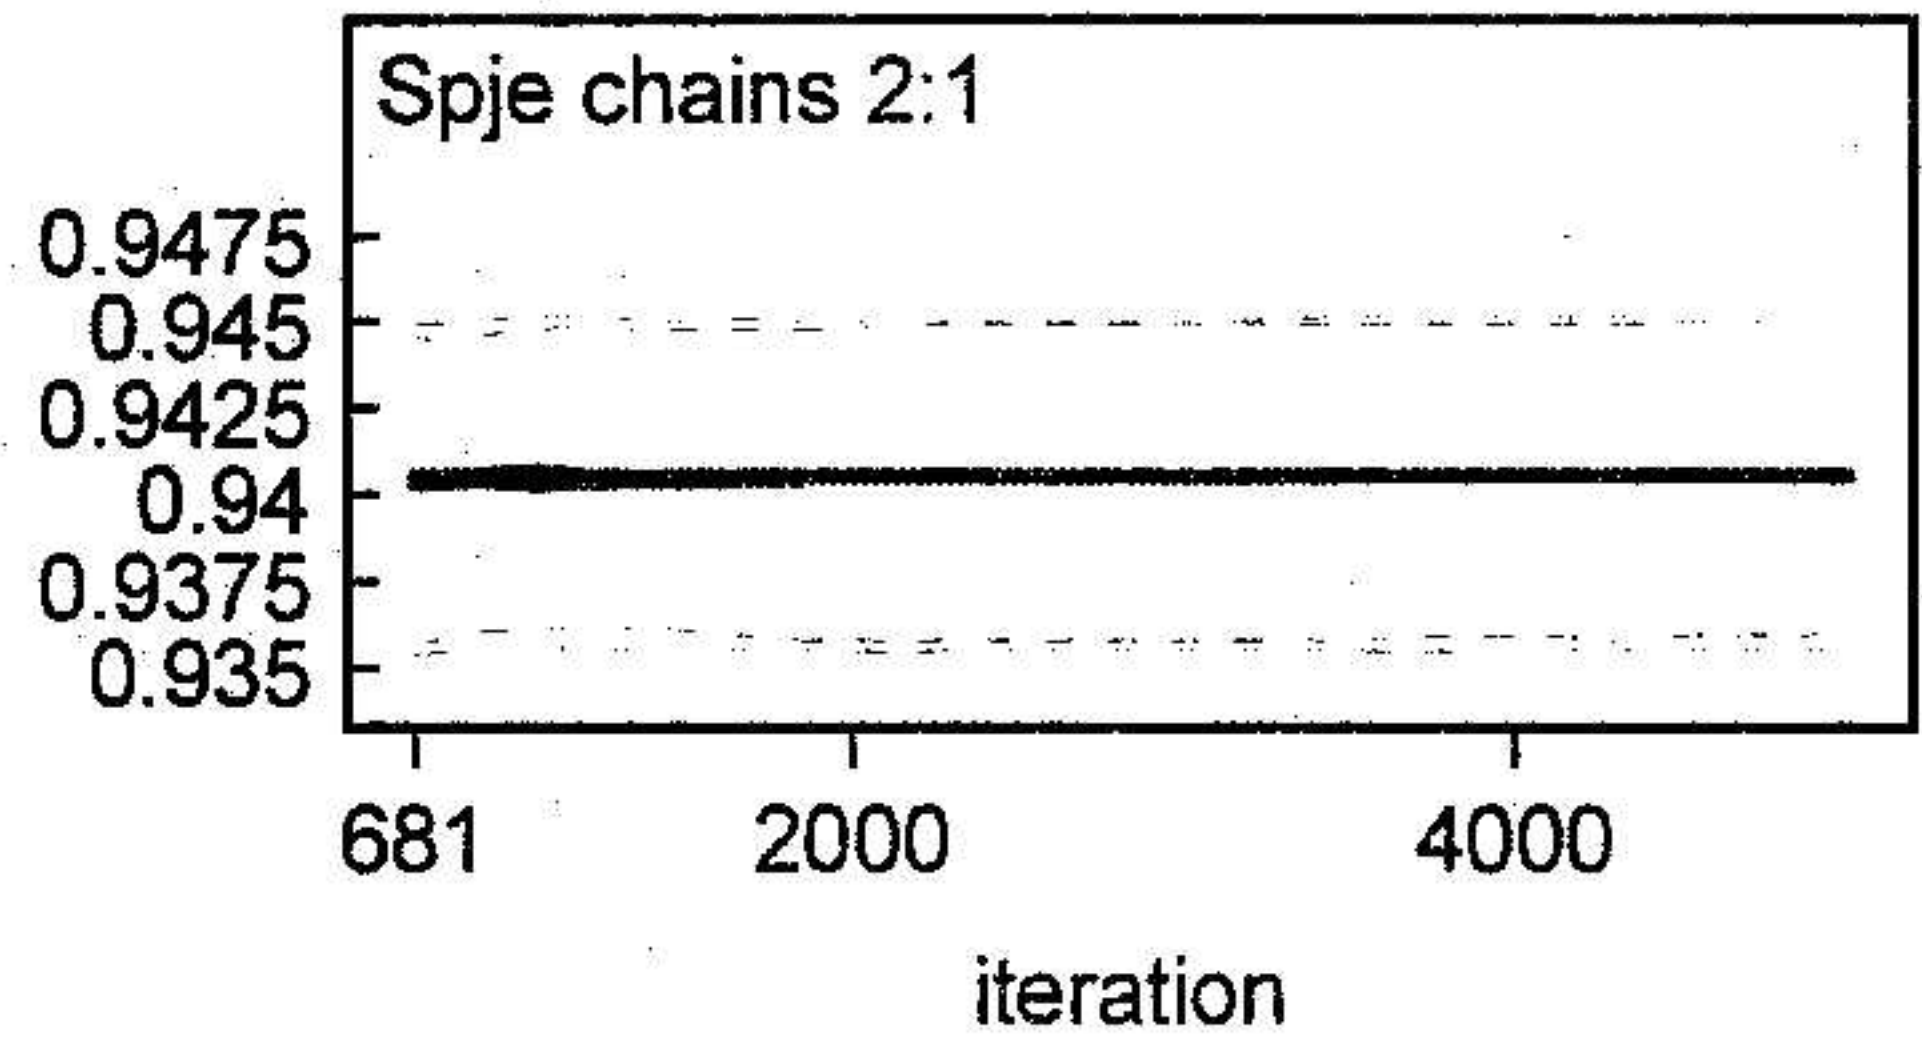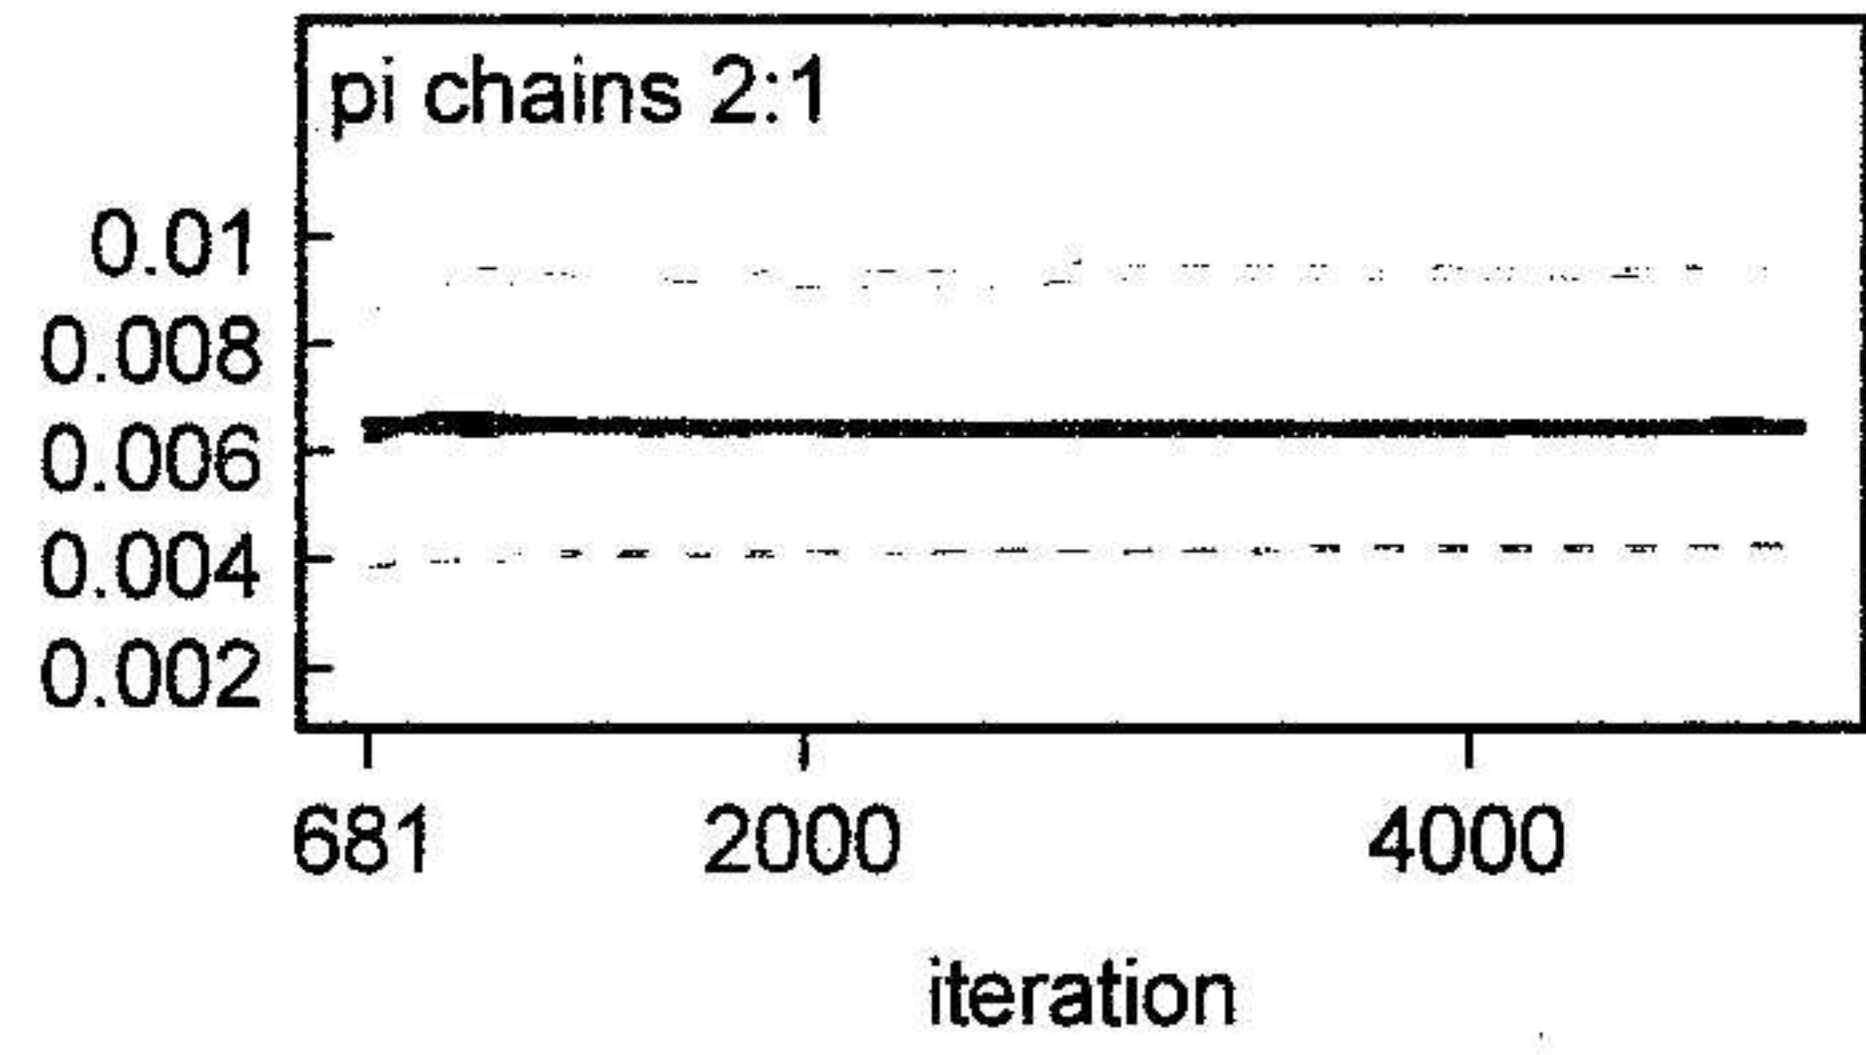

Dynamic trace

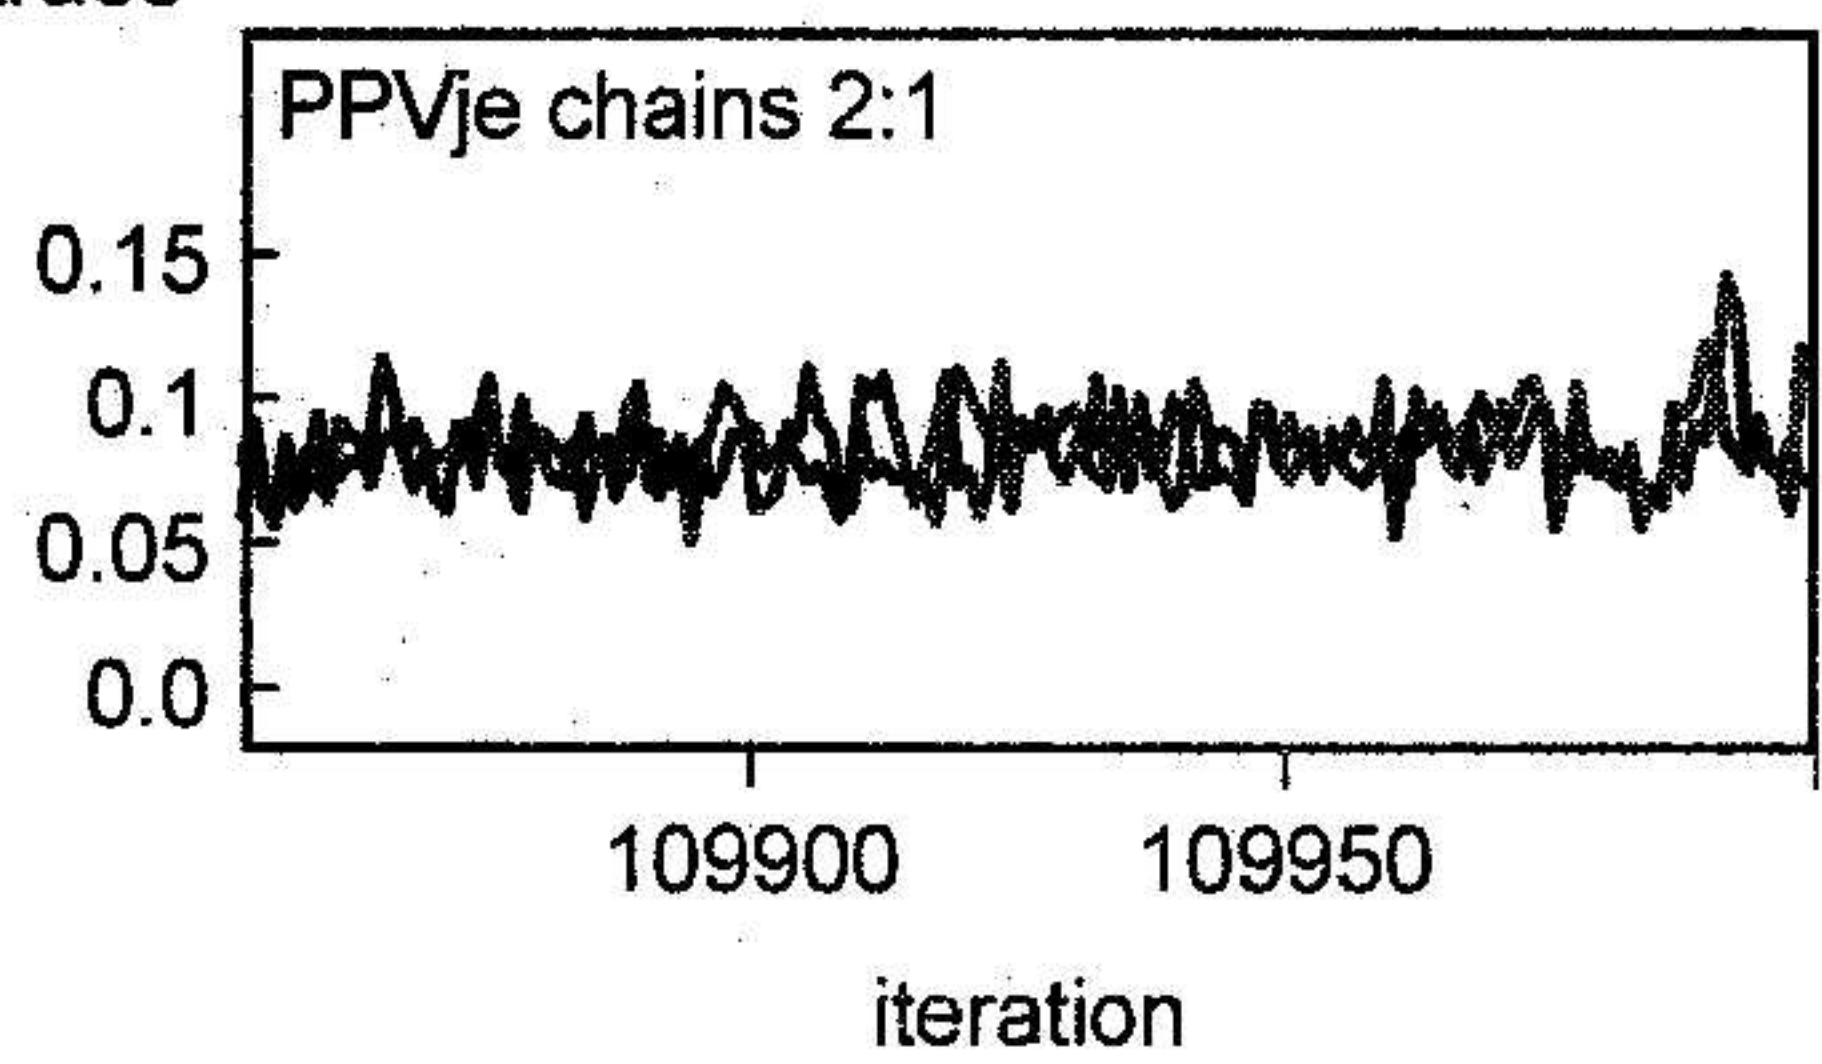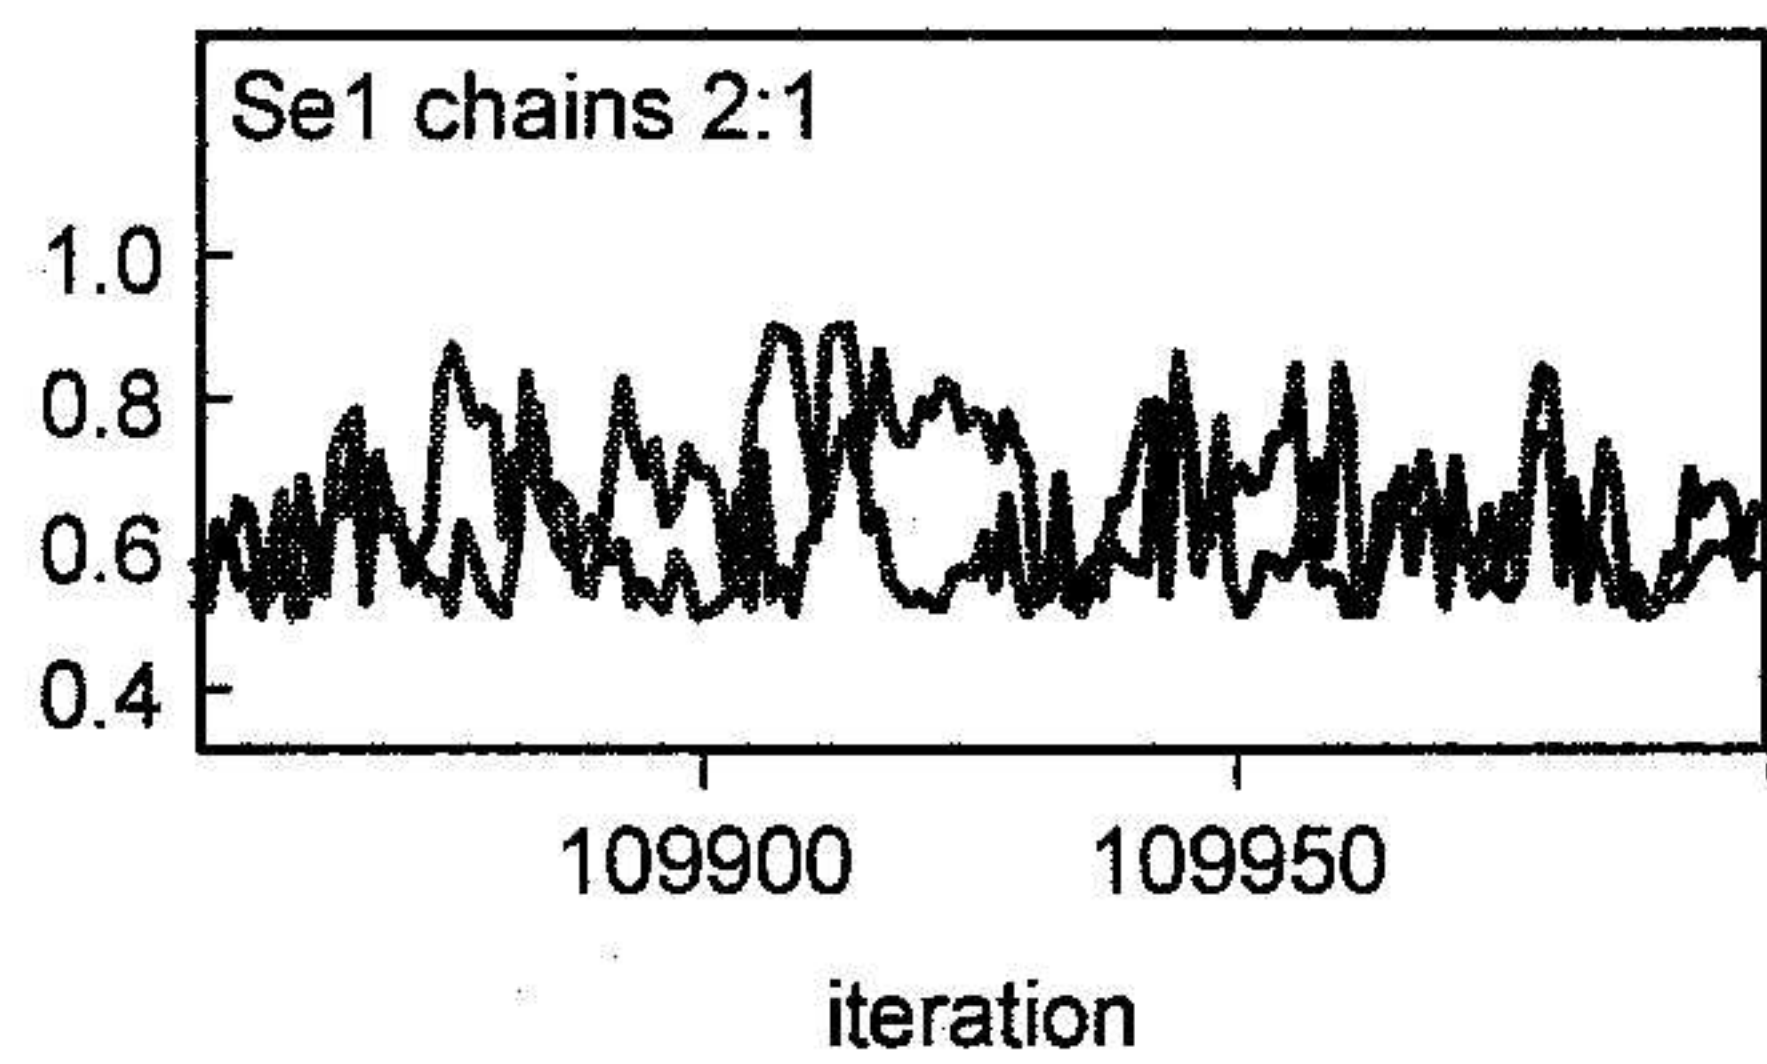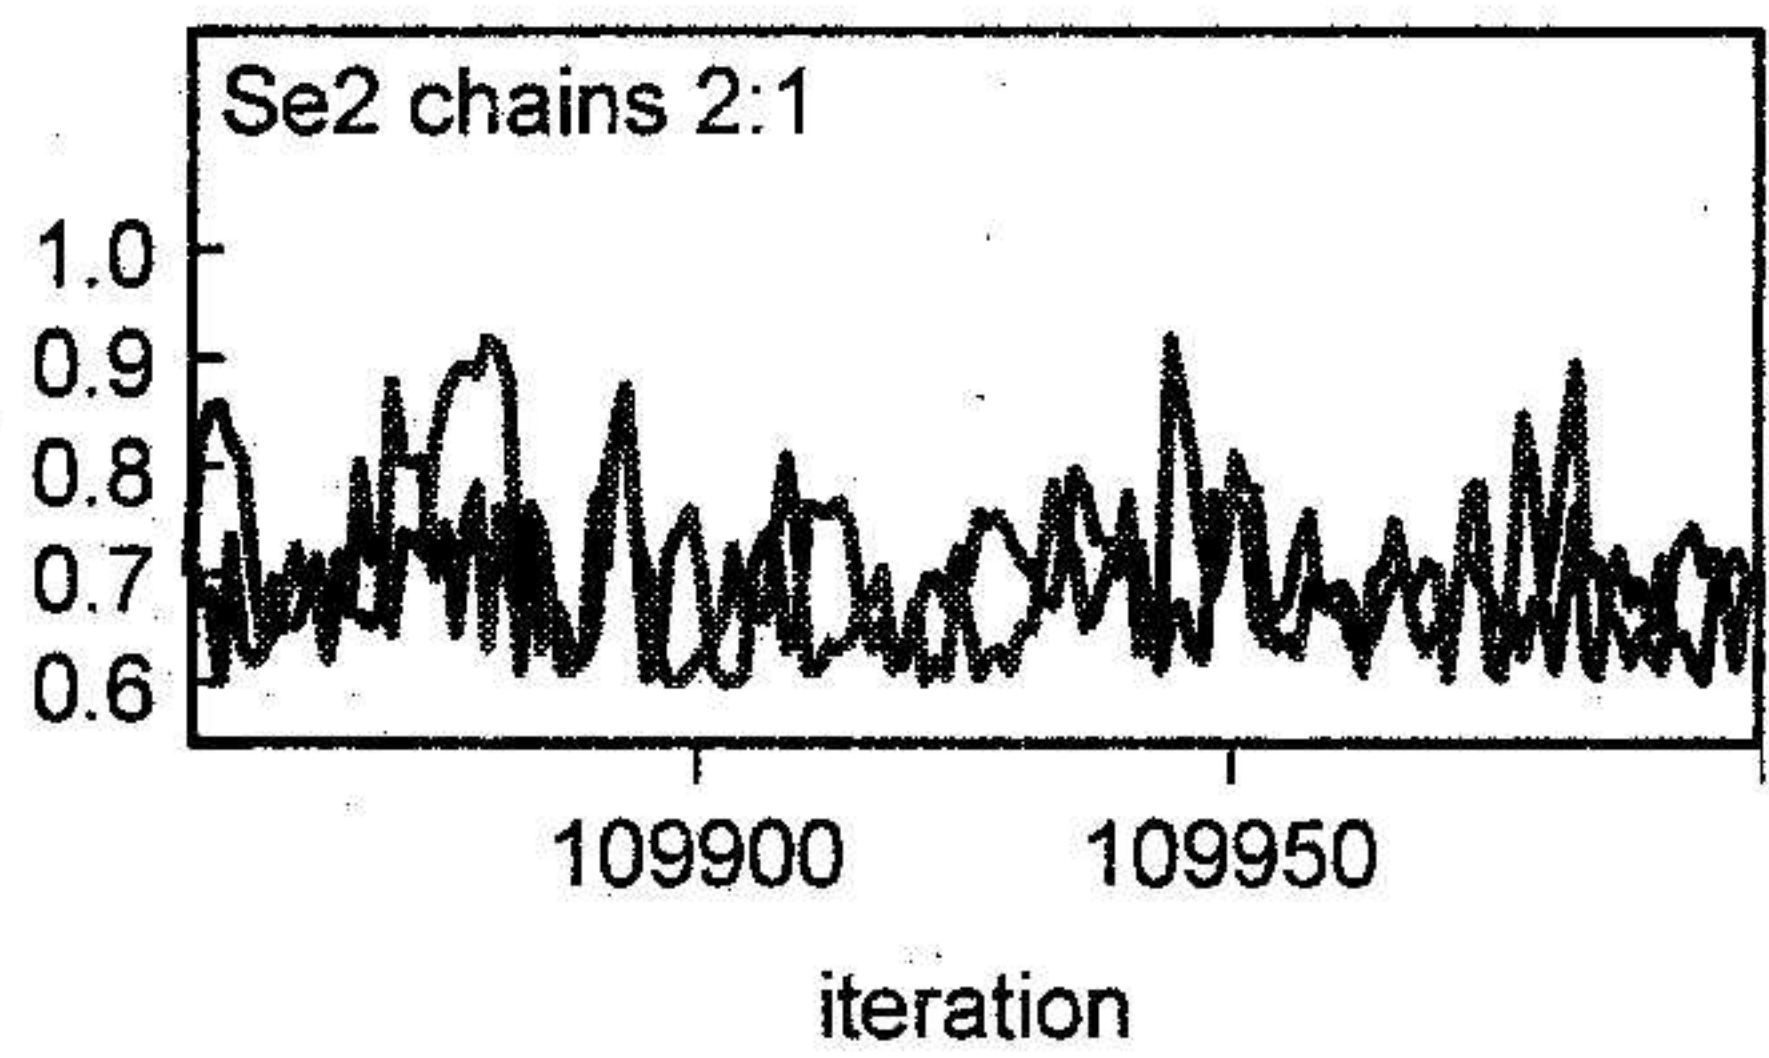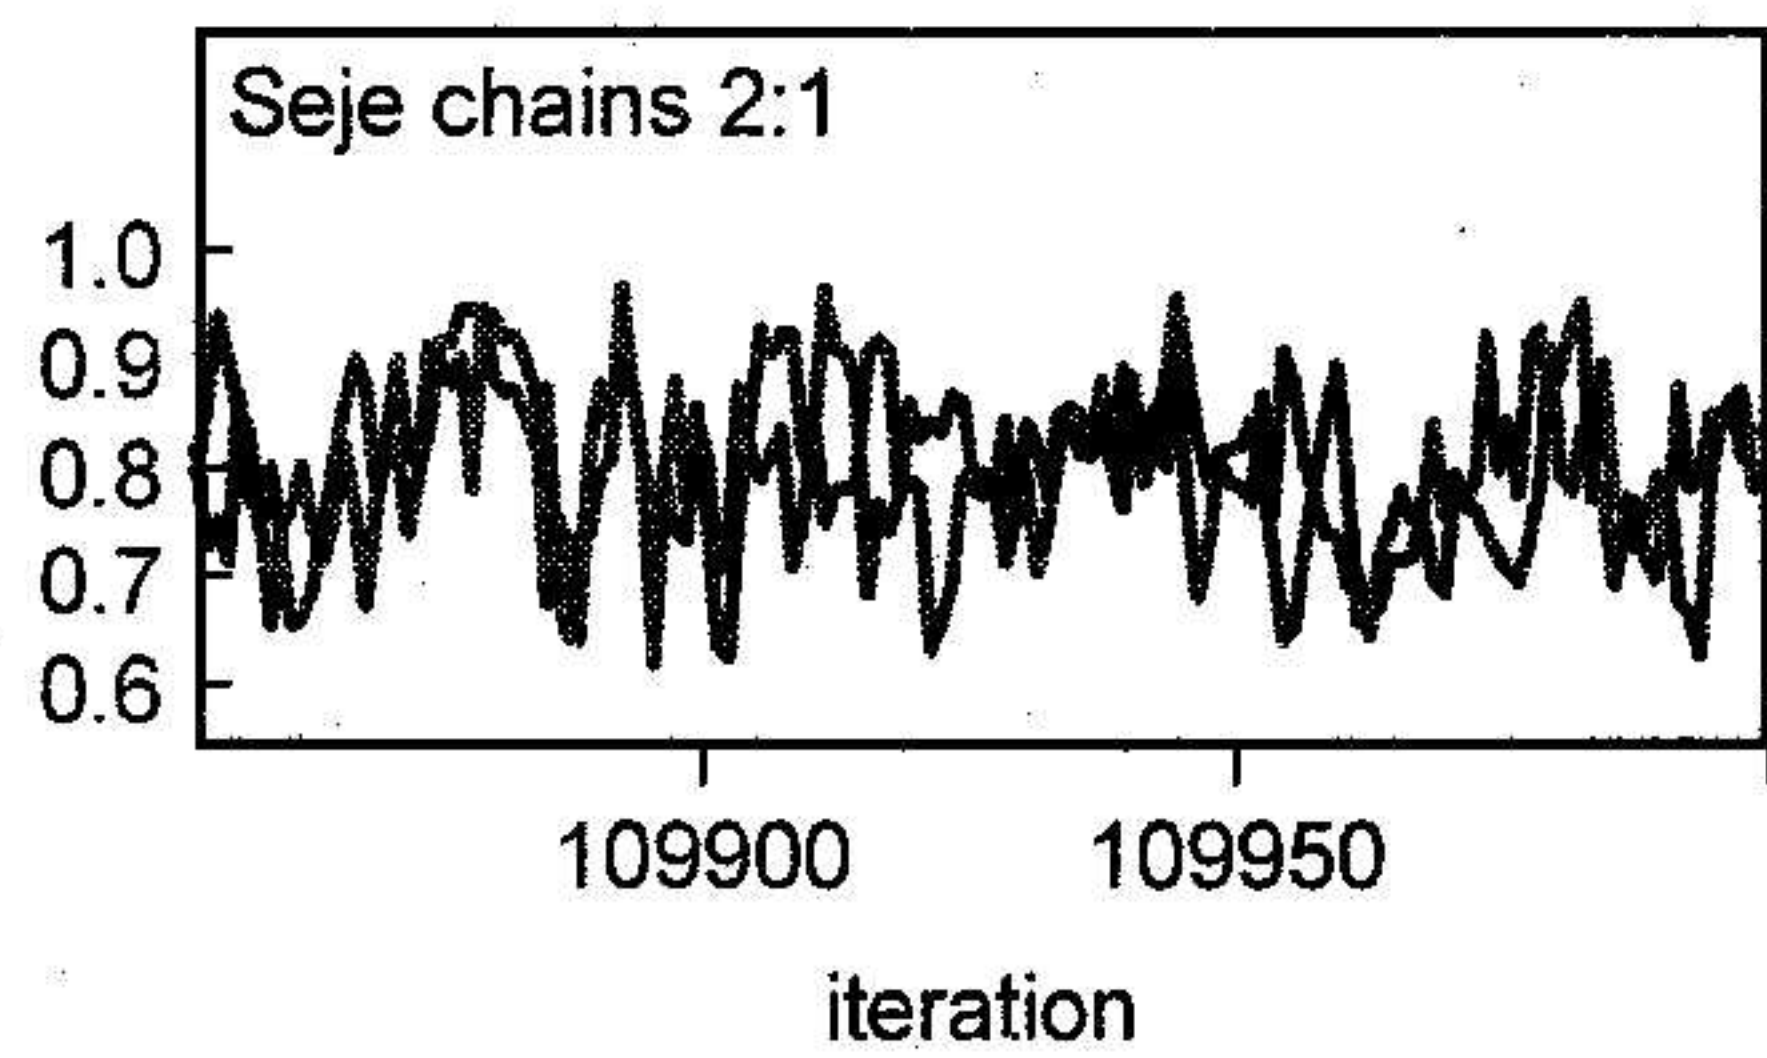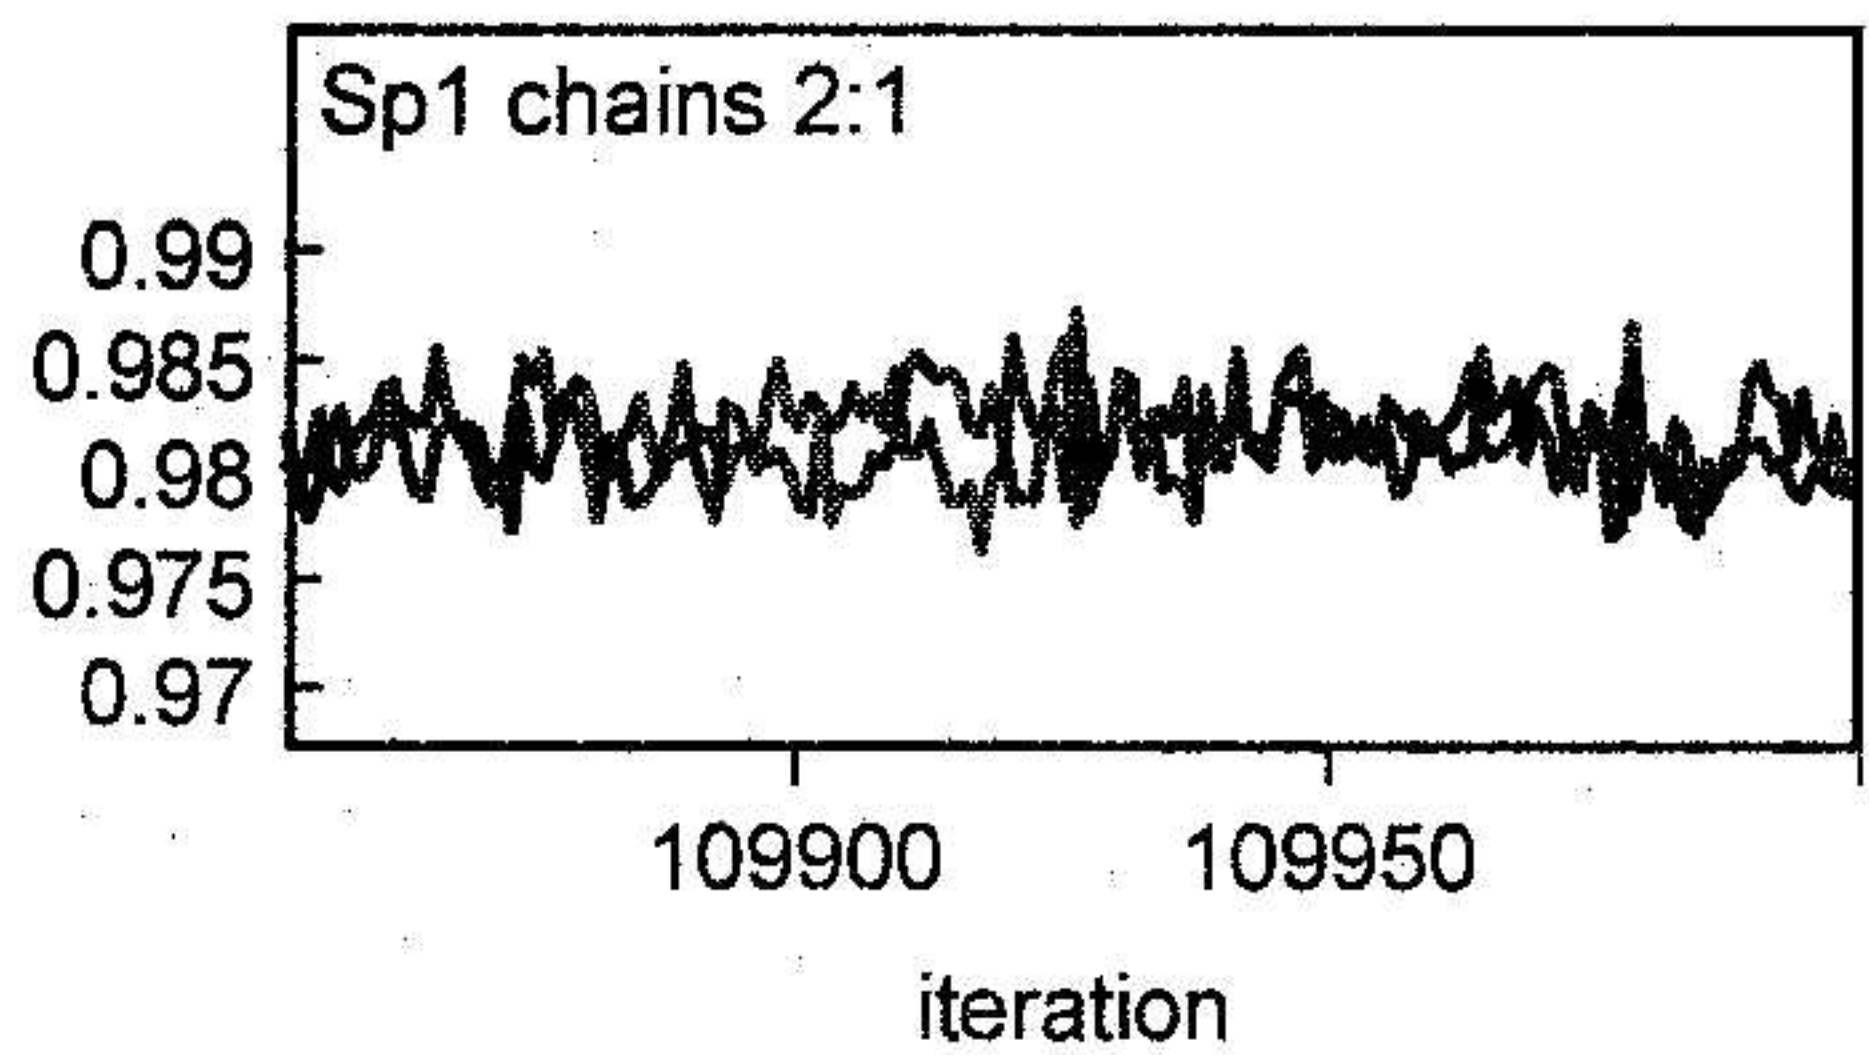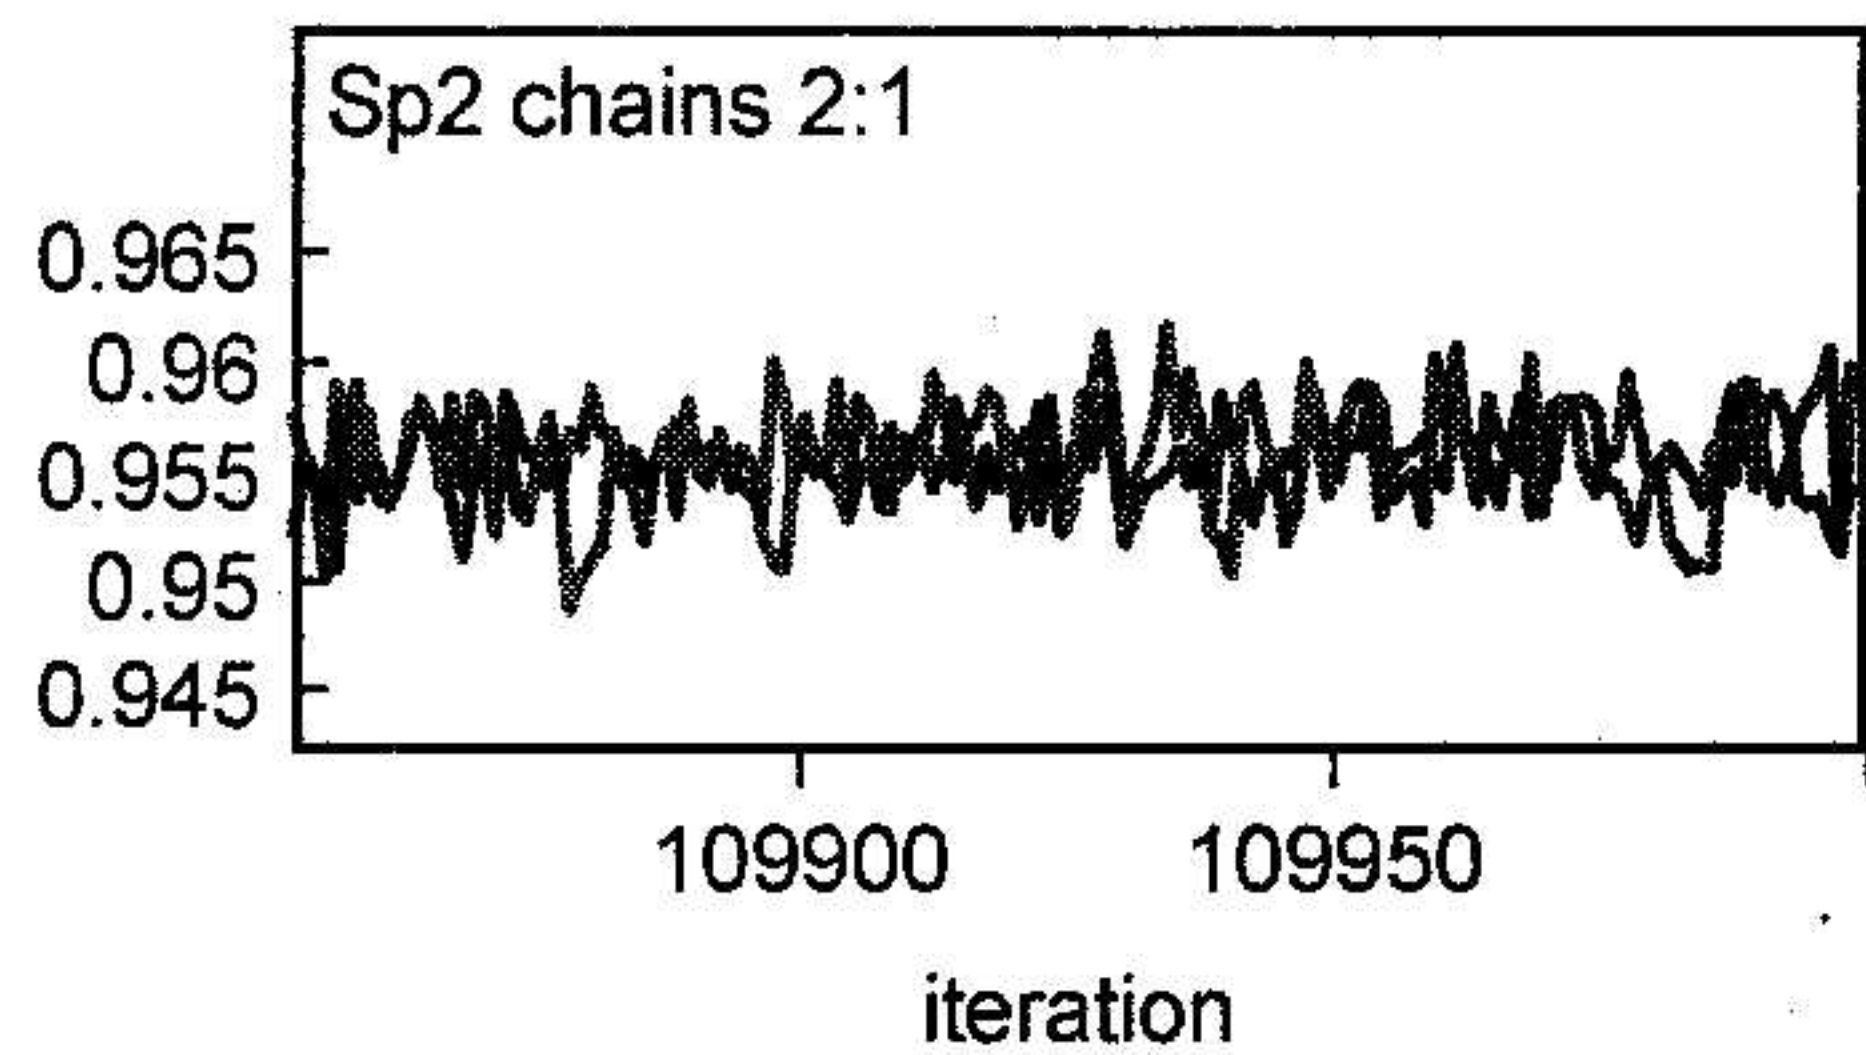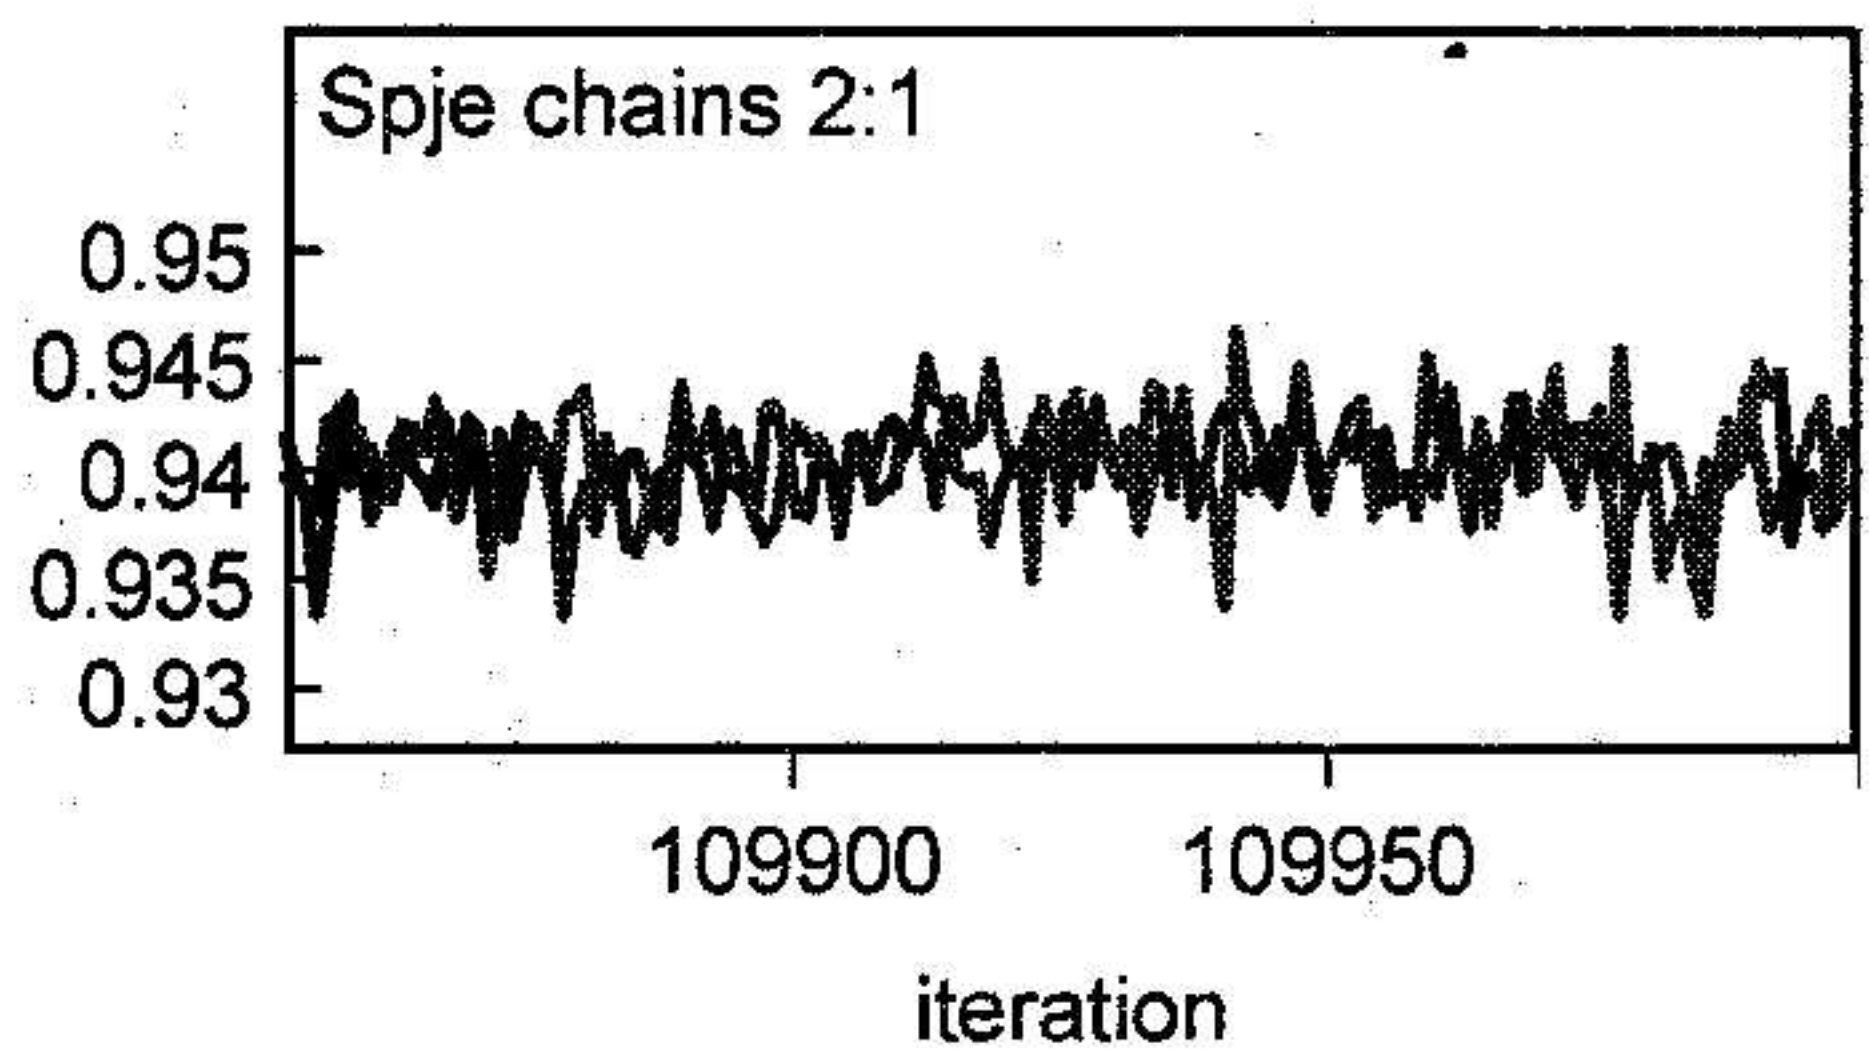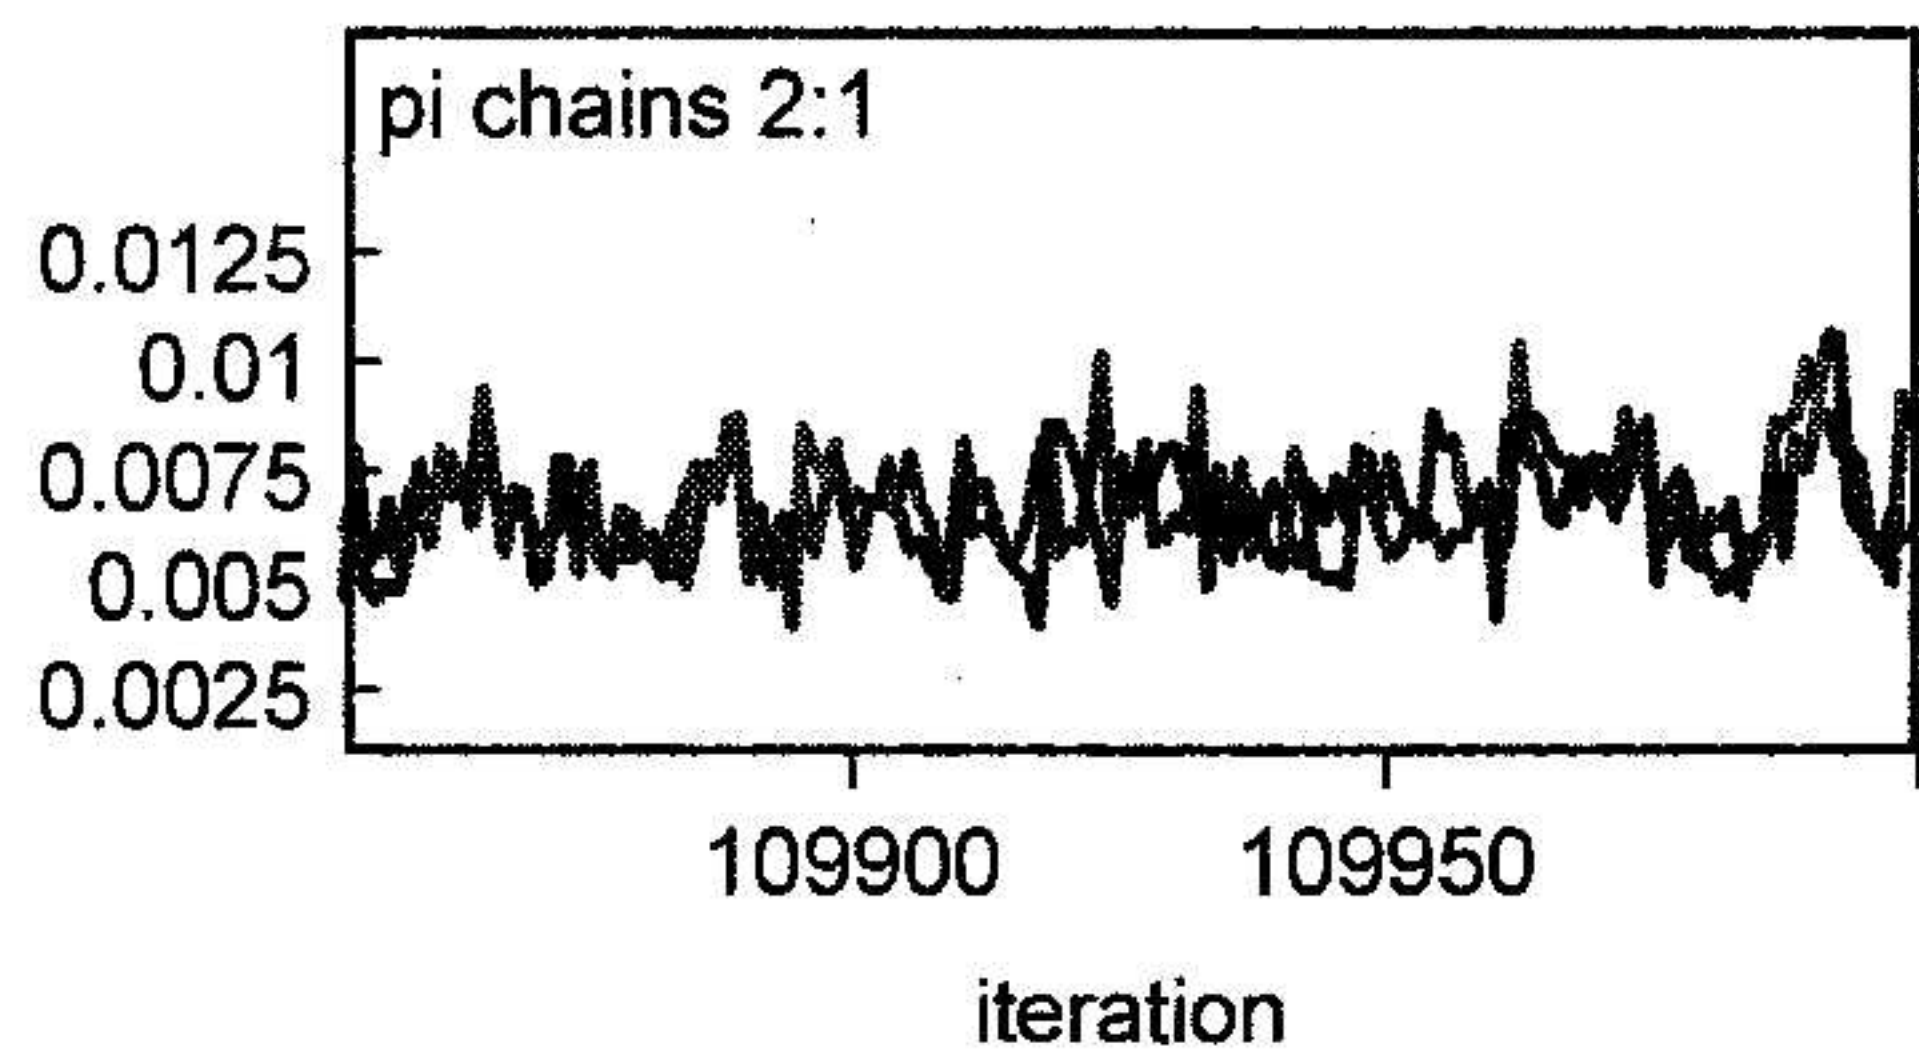

Autocorrelation function

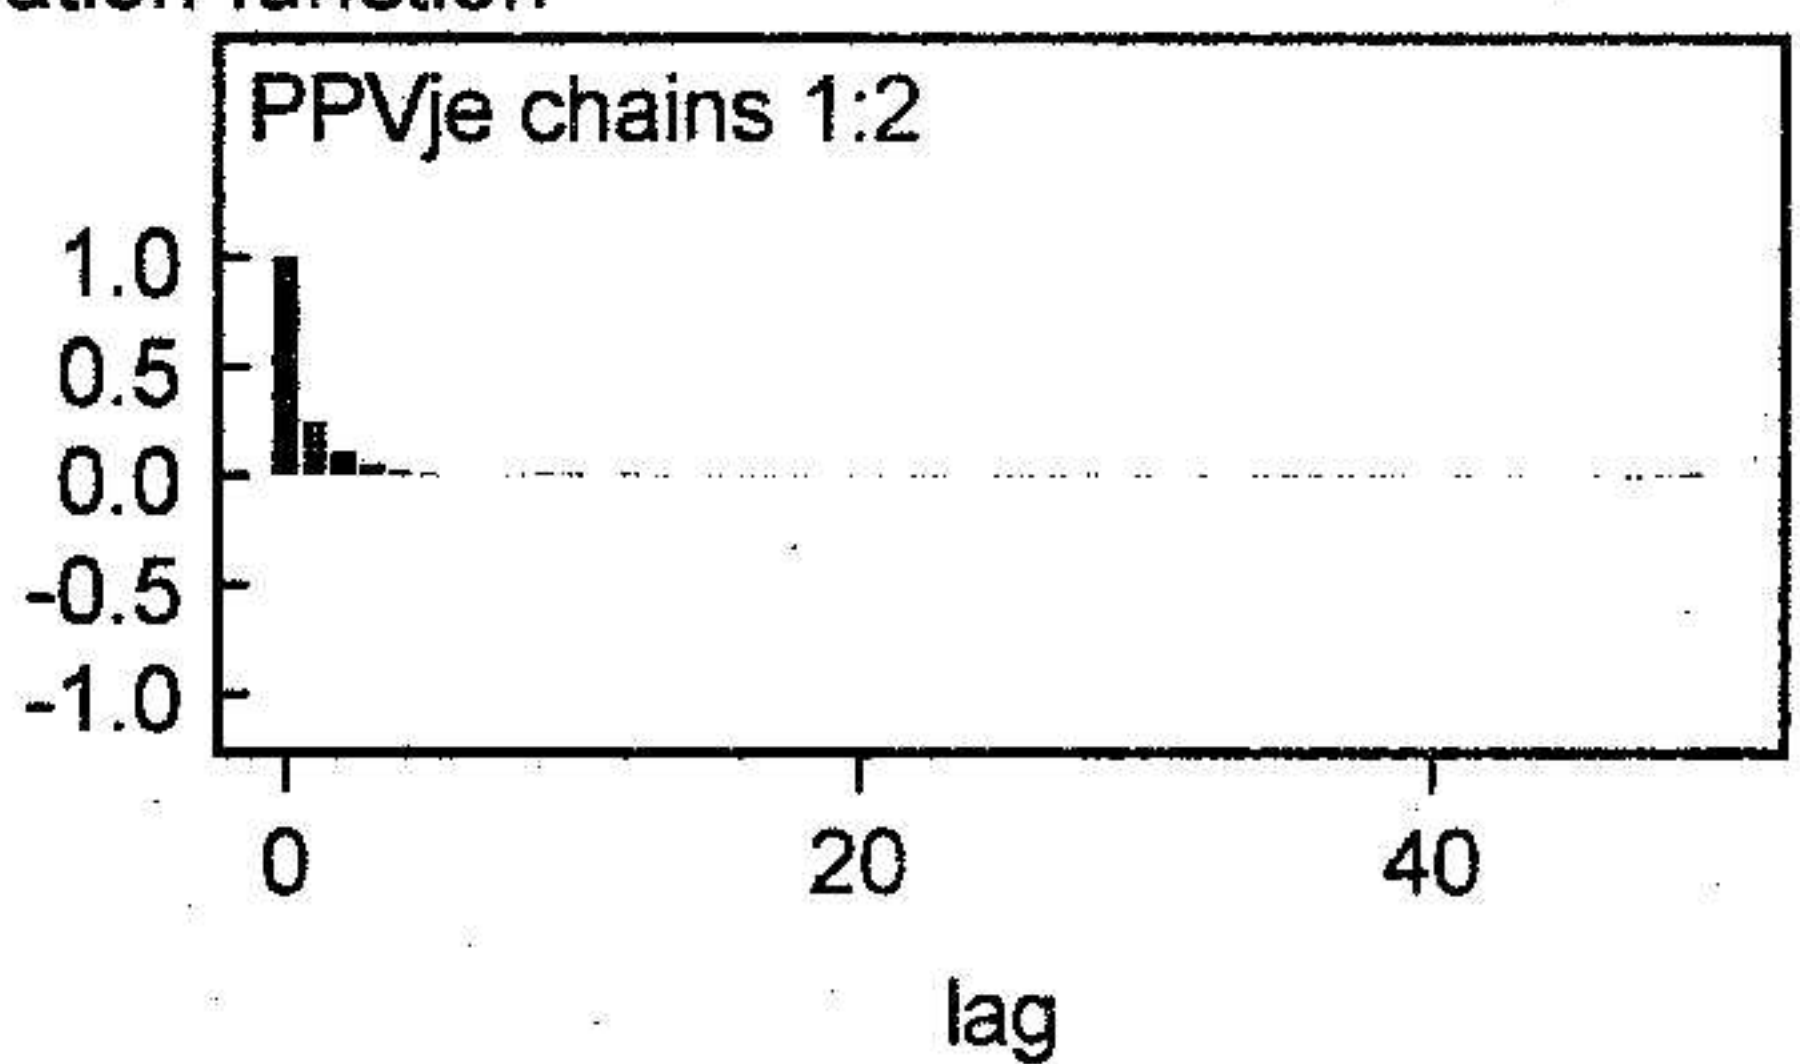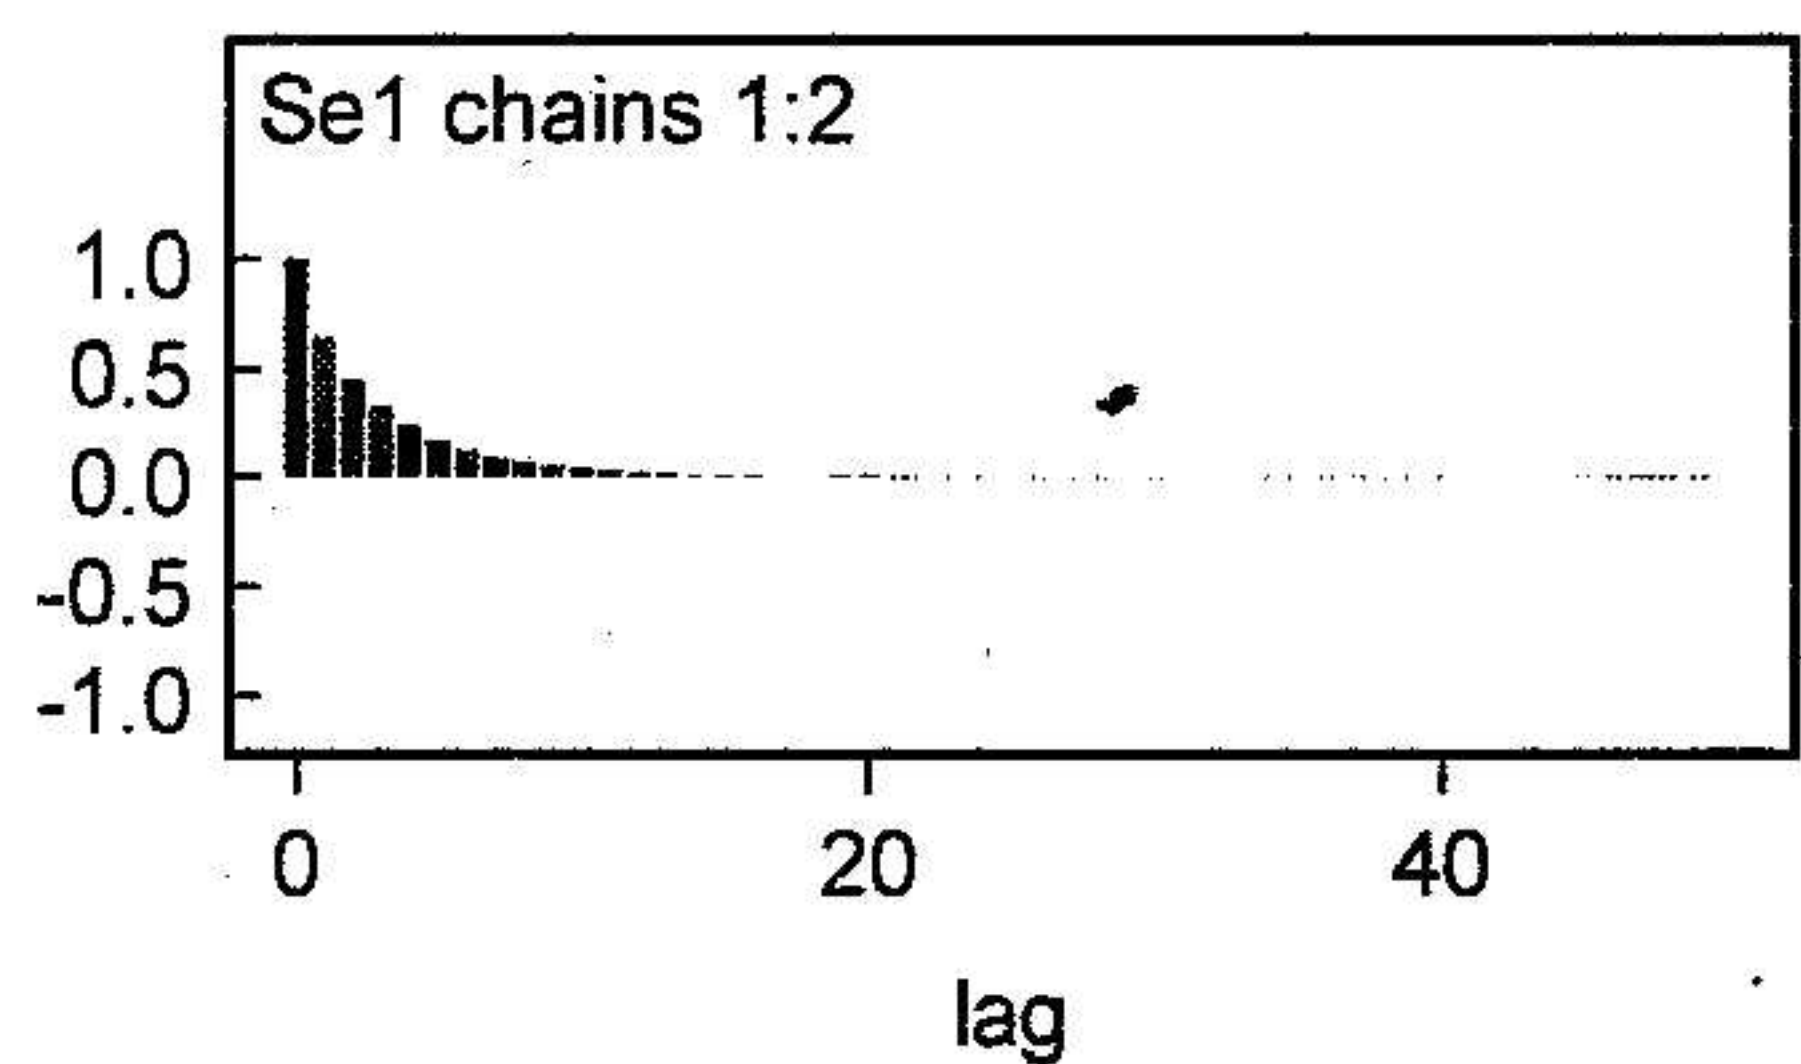



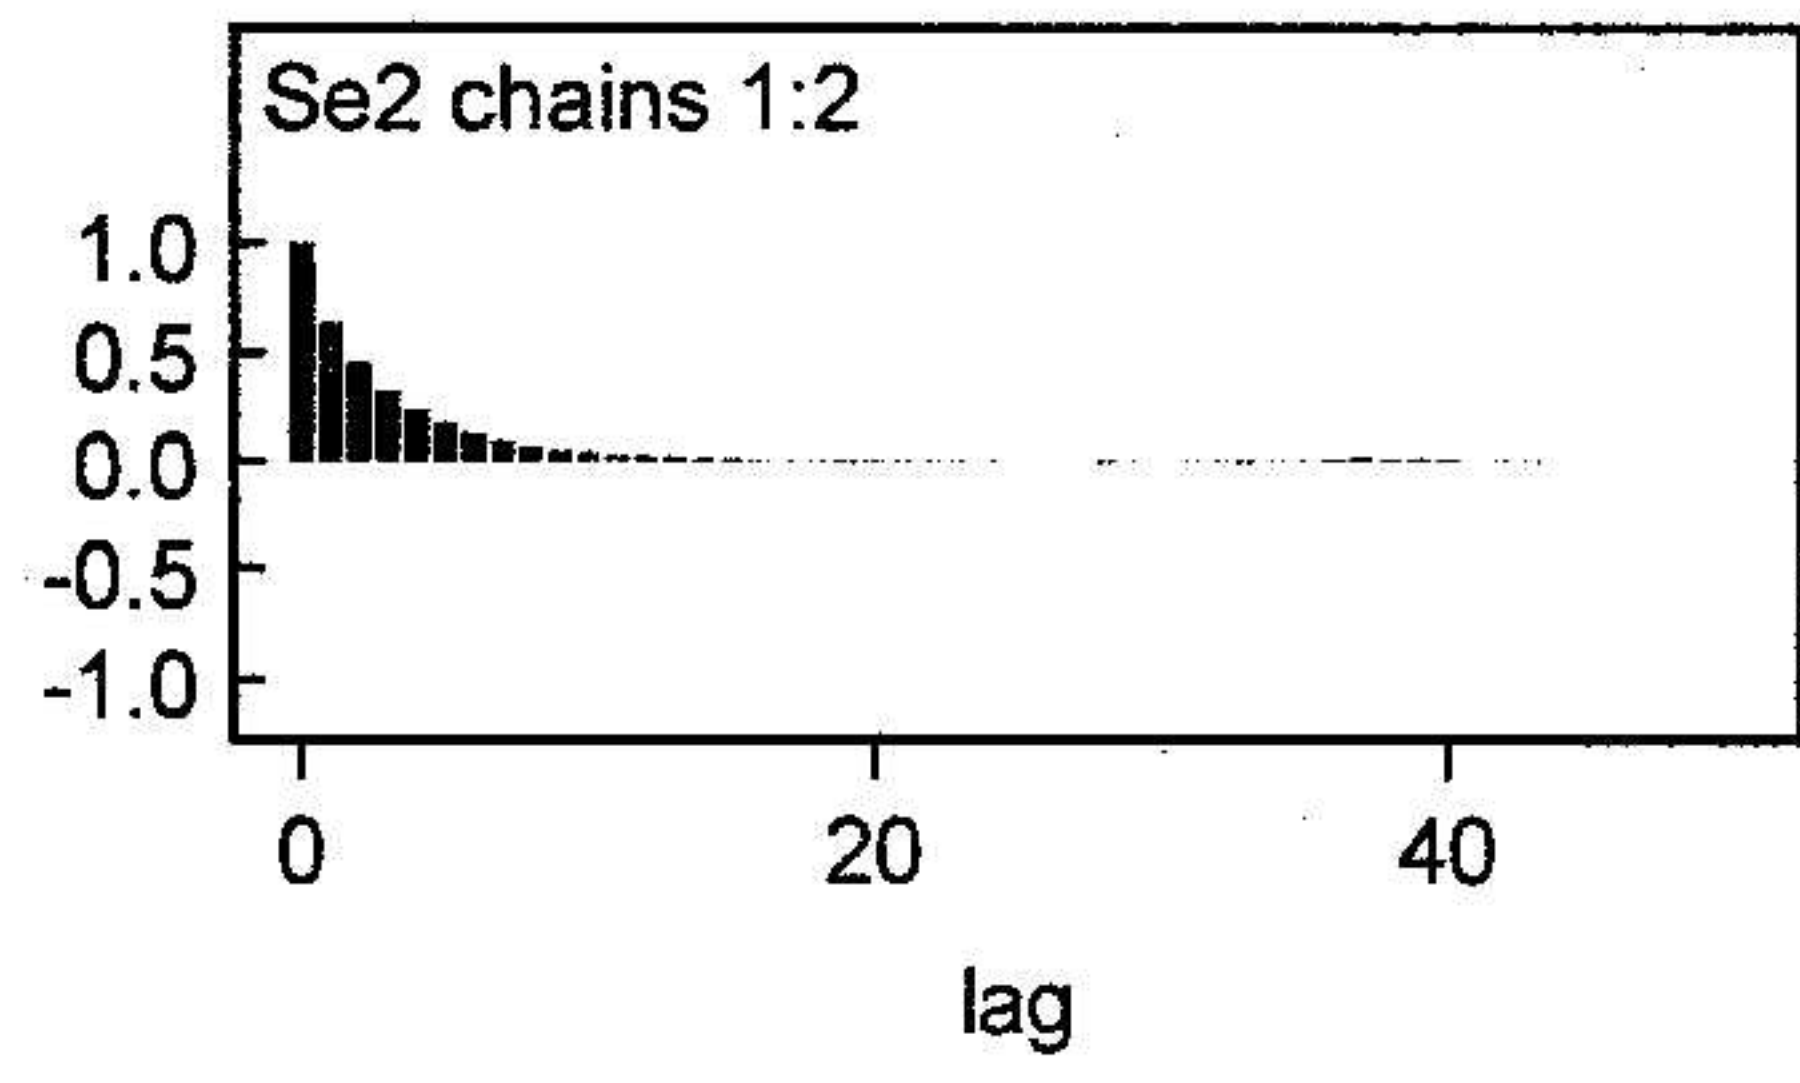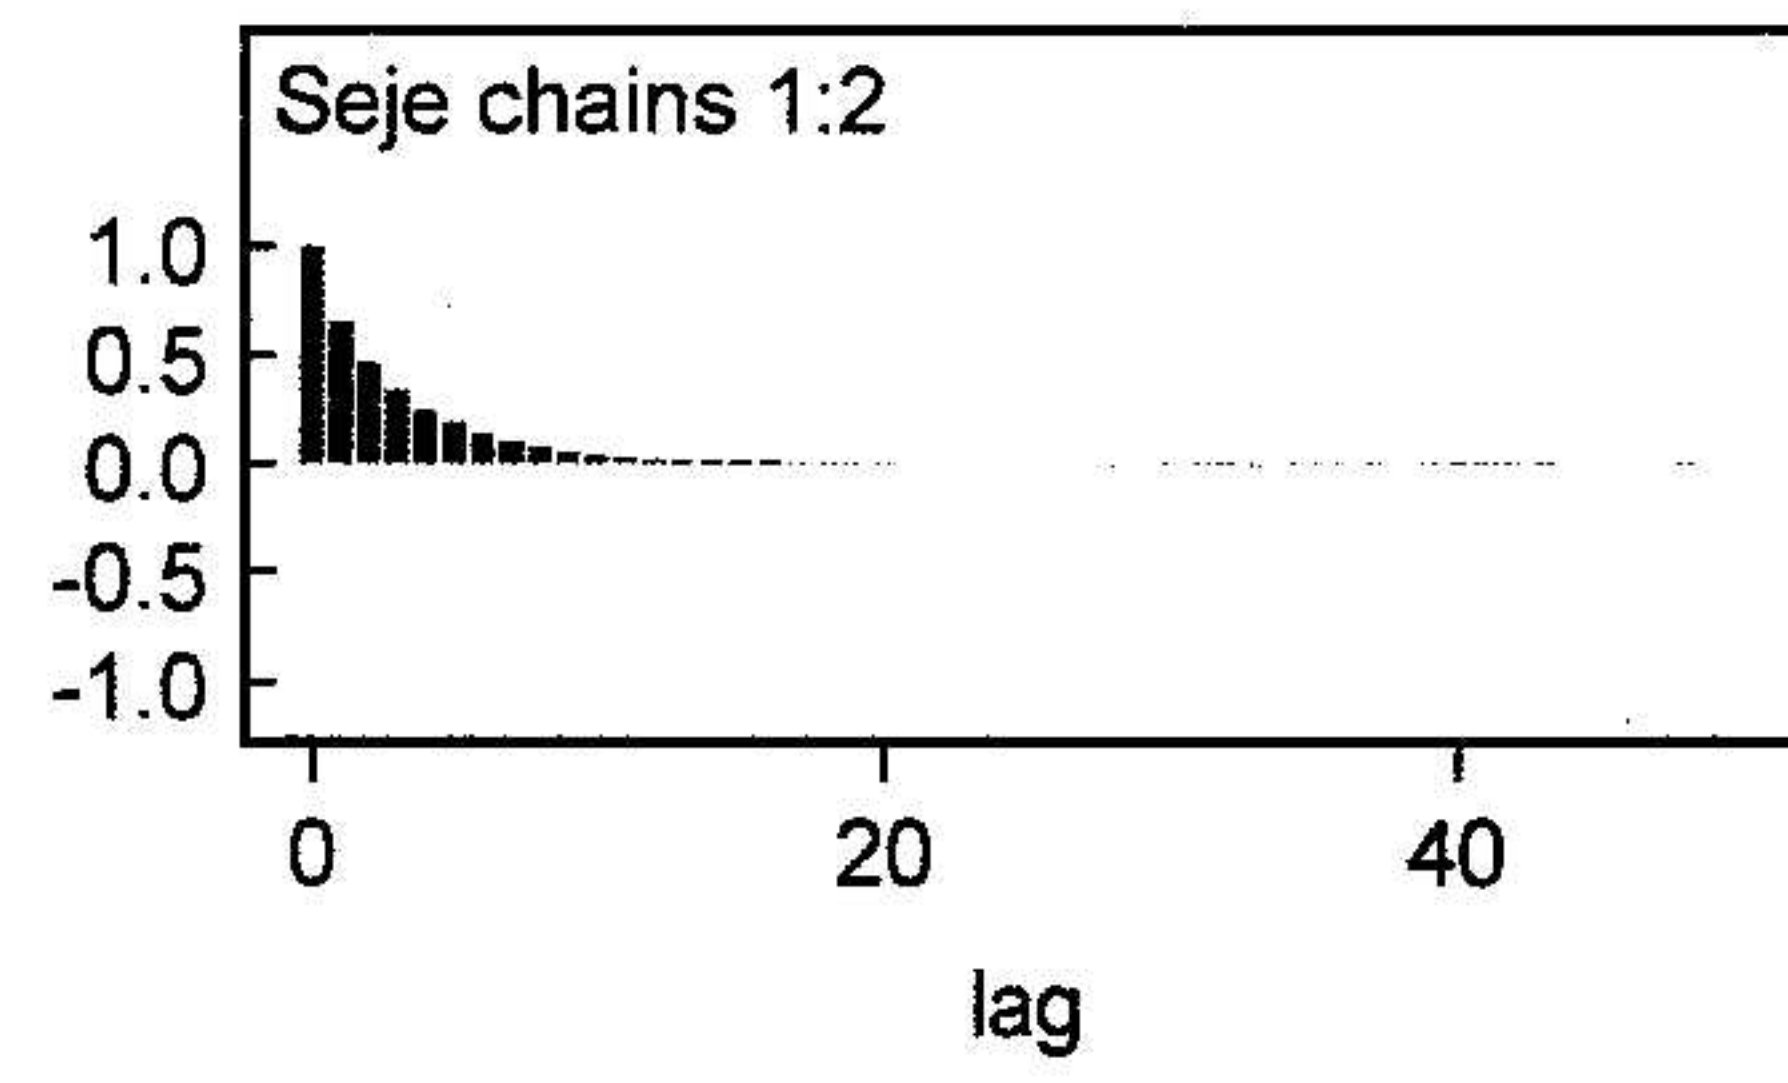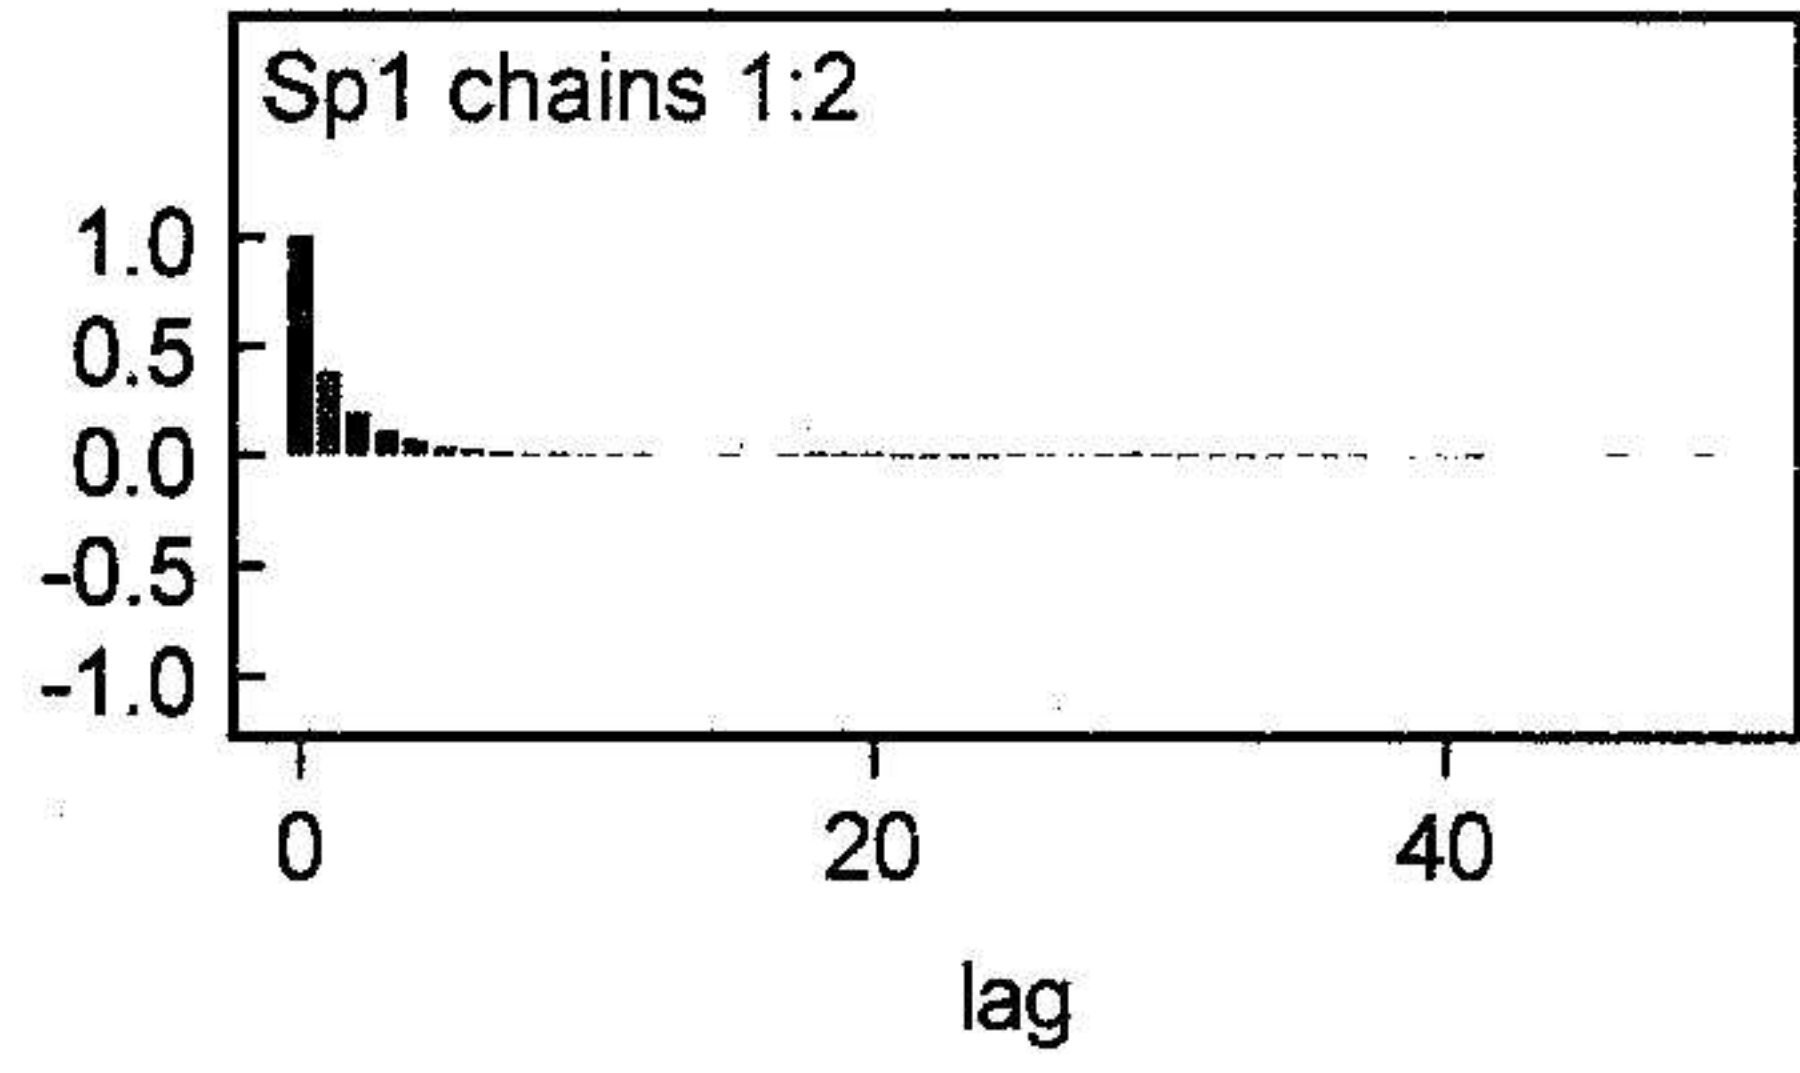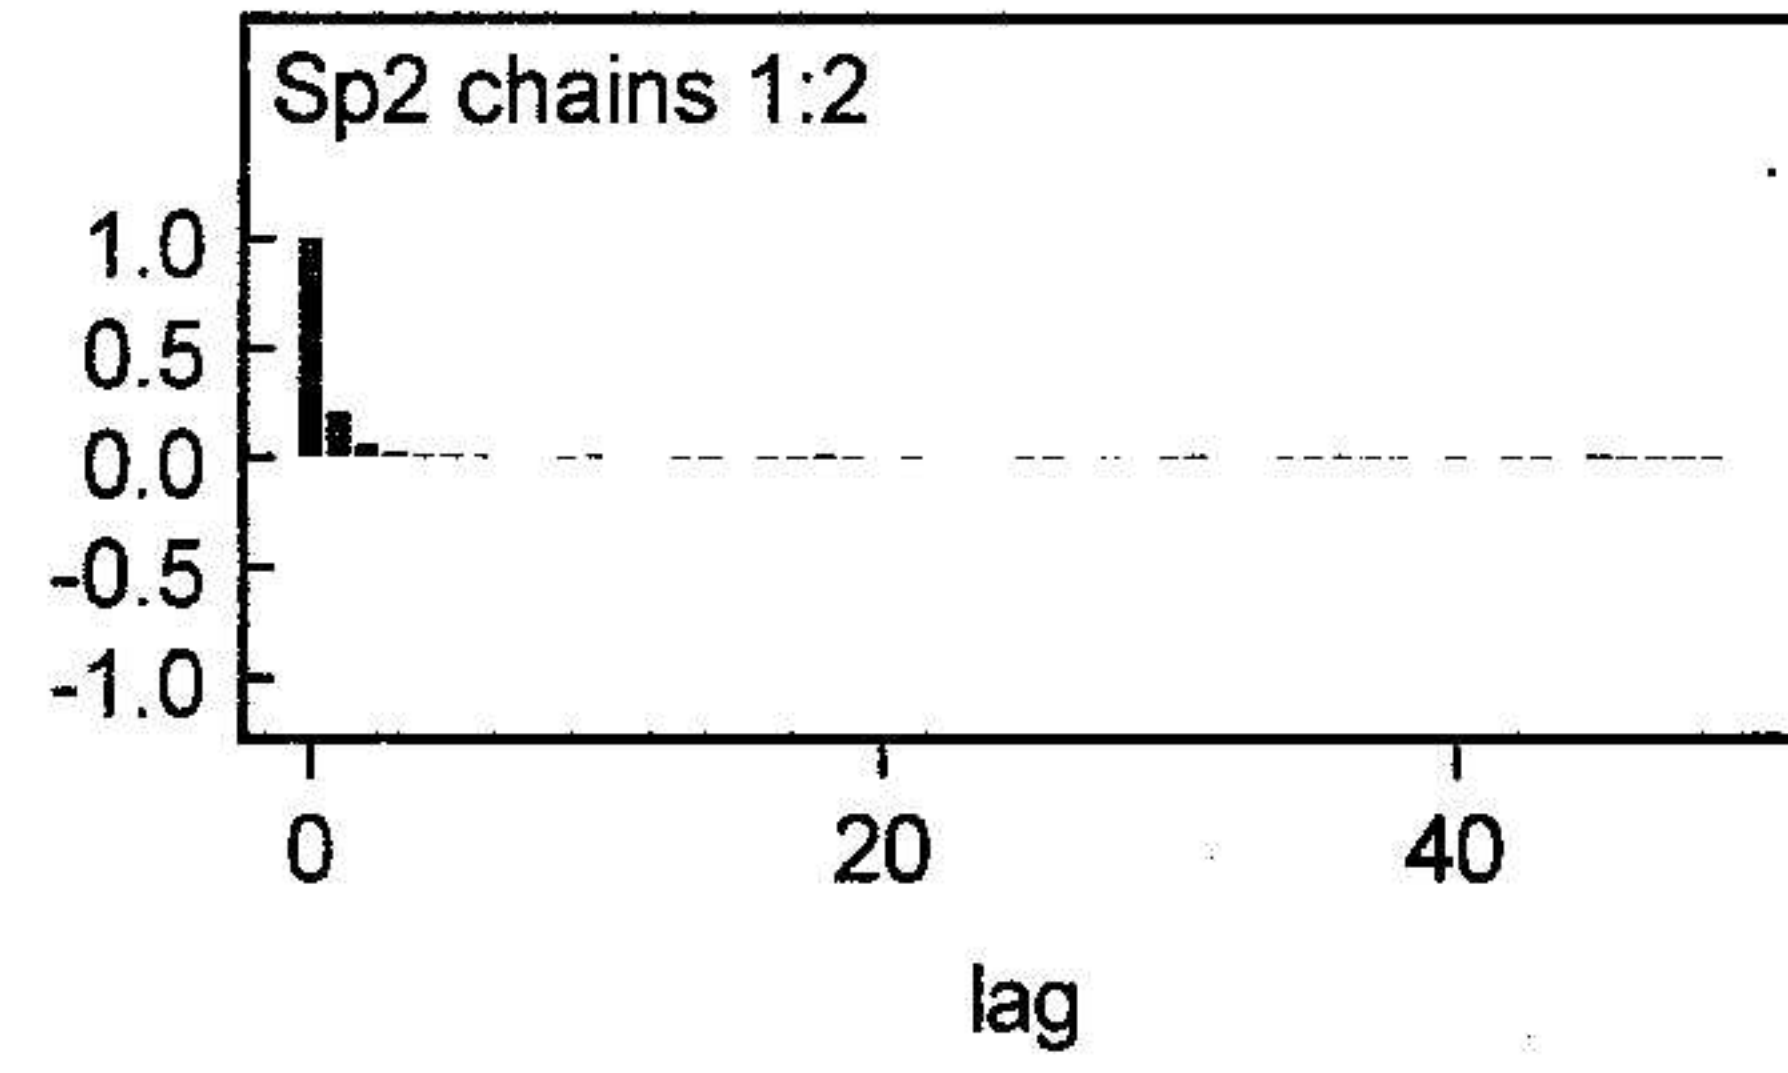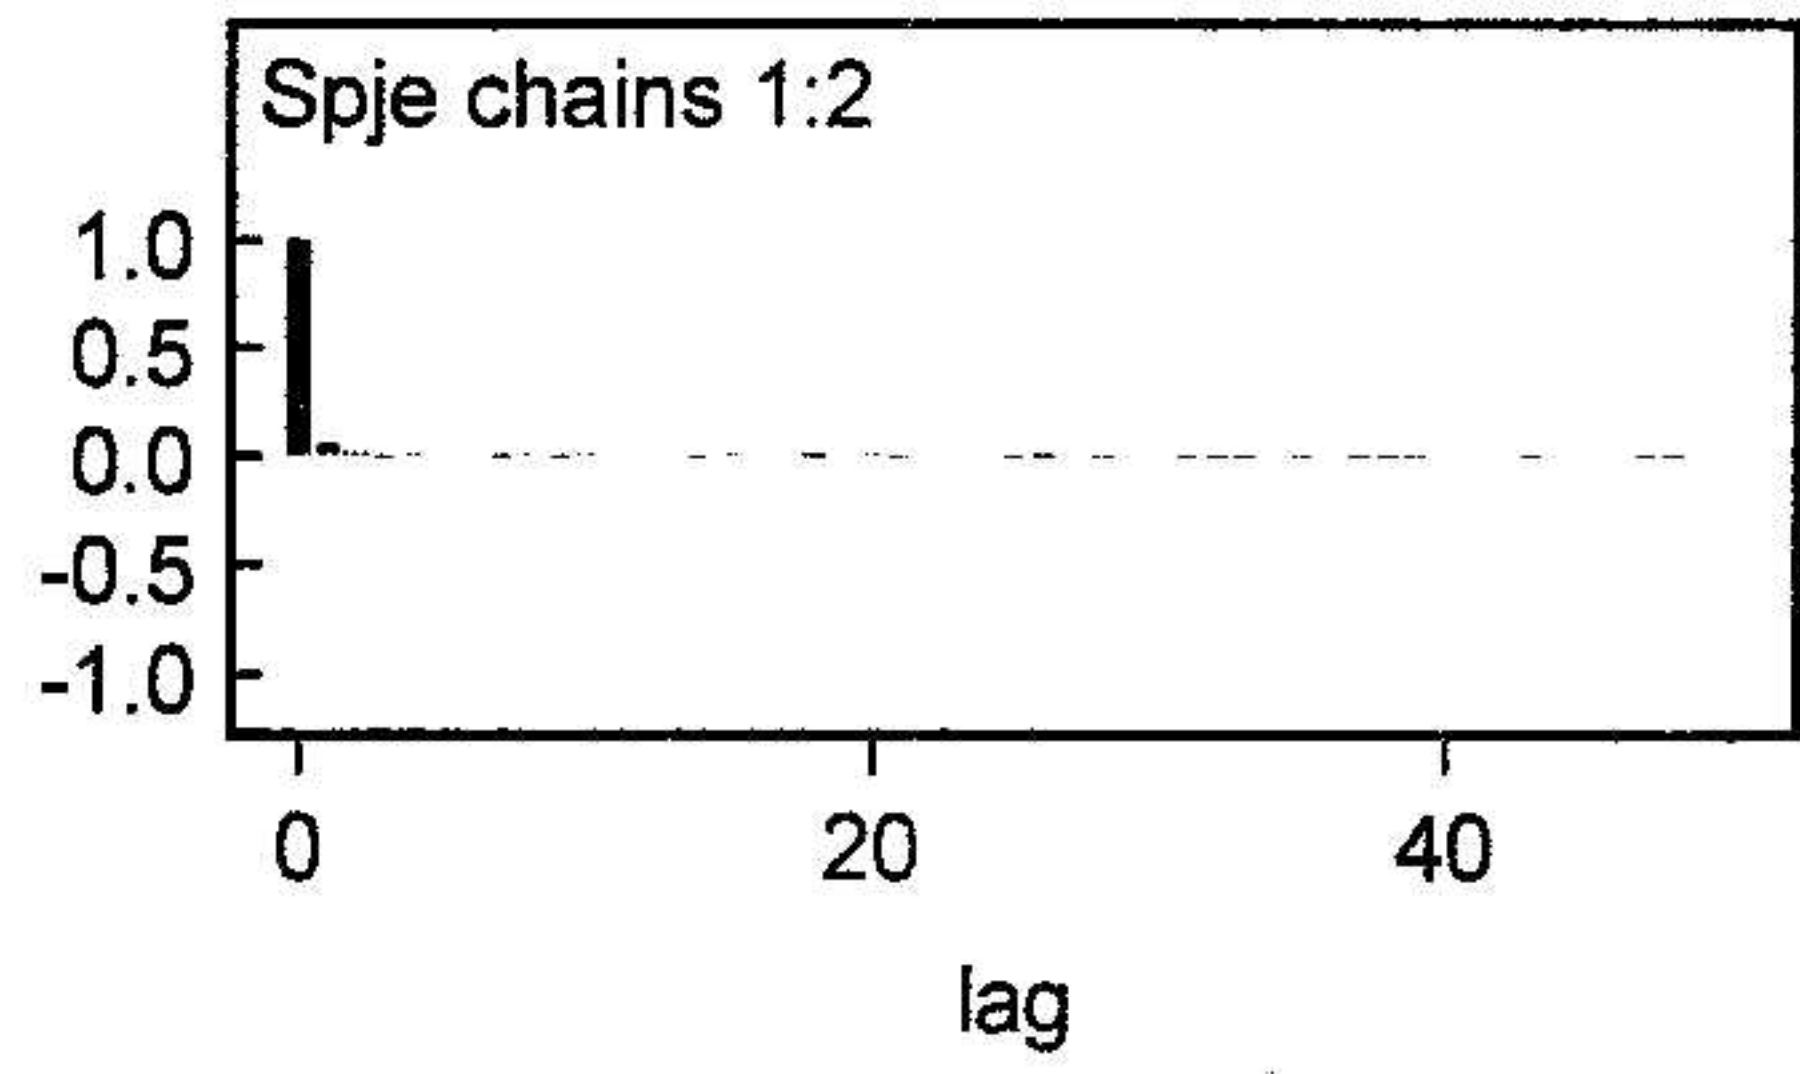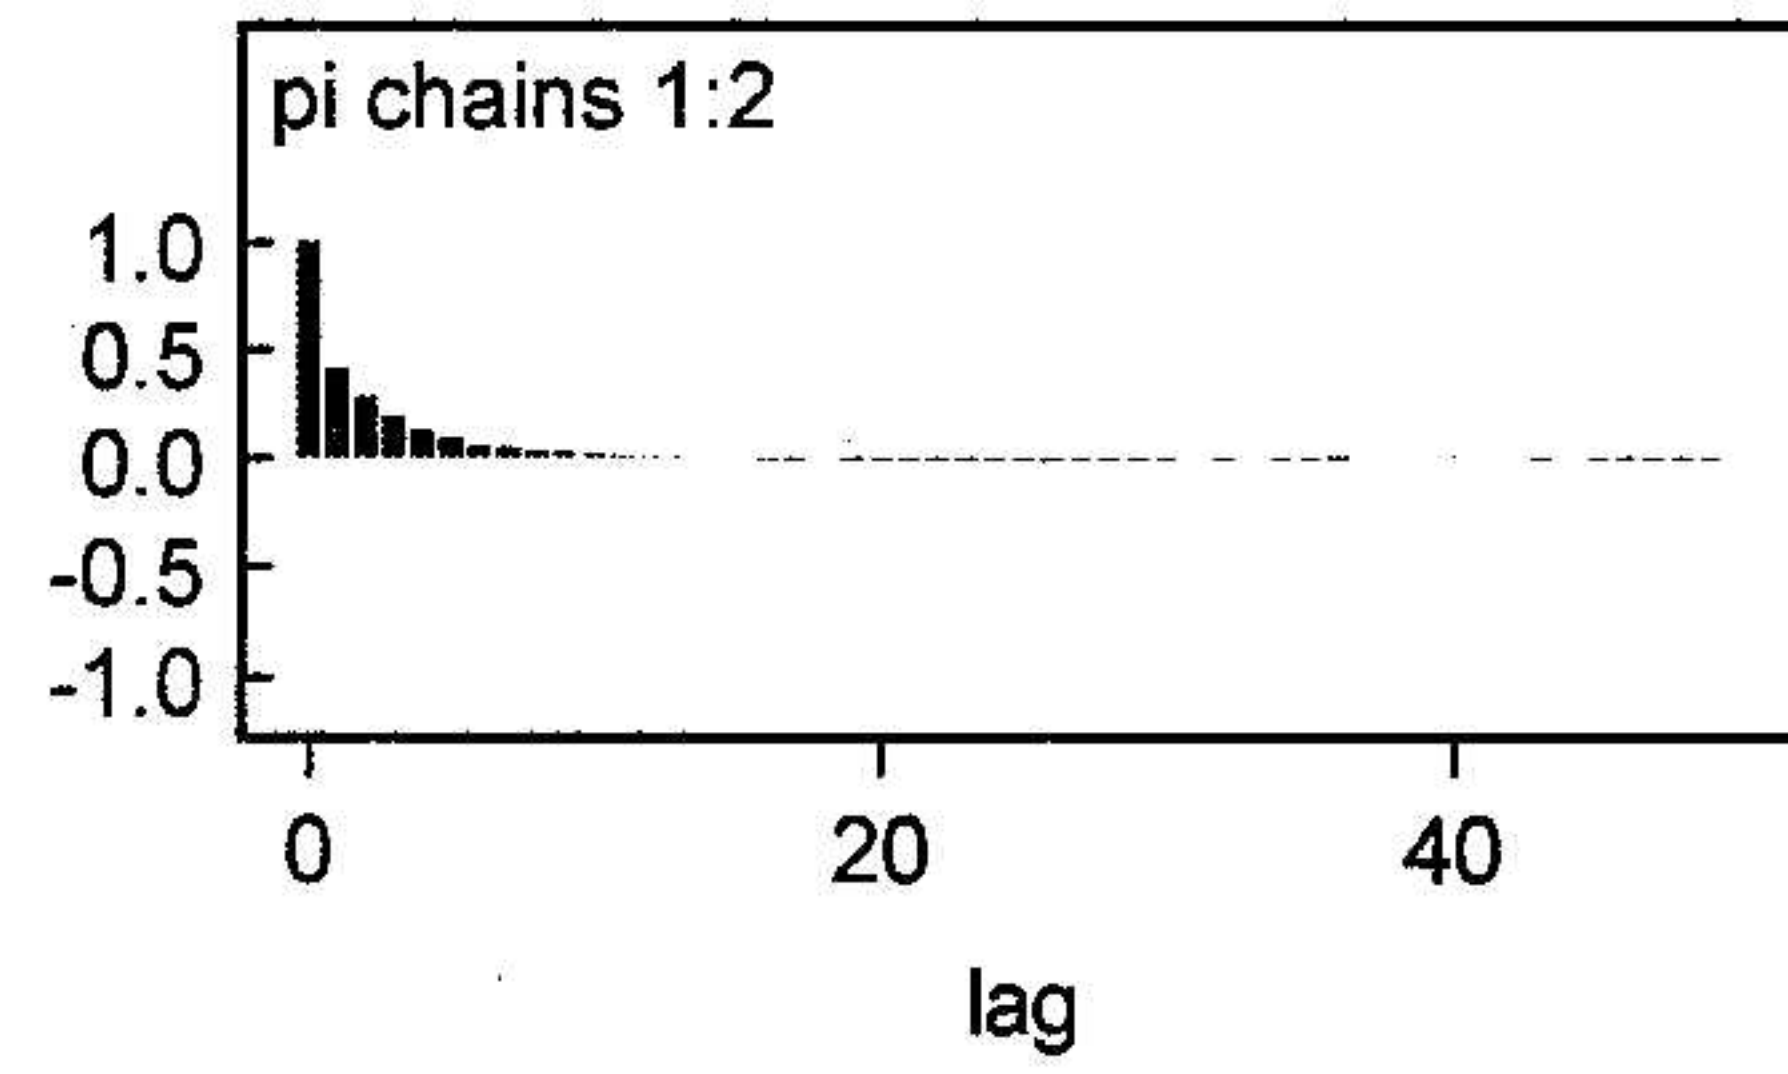

Supplement: 12874_2014_1125_MOESM2_ESM.pdf [file 12874_2014_1125_MOESM2_ESM.pdf]
